# Supplementary material for: Active Nuclear Import of Mammalian Cell-Expressible DNA Origami
Source: PubMed Central journal article supplement (PMC9999407; doi:10.1021/jacs.2c12733), 2023-02-24
Supplement: ja2c12733_si_001.pdf [file ja2c12733_si_001.pdf]

# Active nuclear import of mammalian cell-expressible DNA origami

Anna Liedl<sup>‡,§</sup>, Johanna Griebing<sup>‡,§</sup>, Jessica A. Kretzmann<sup>‡,§,†,\*</sup> and Hendrik Dietz<sup>‡,§,\*</sup>

<sup>‡</sup> Department of Biosciences, School of Natural Sciences, Technical University of Munich, Am Coulombwall 4a, 85748 Garching, Germany.

<sup>§</sup> Munich Institute of Biomedical Engineering, Technical University of Munich, Boltzmannstraße 11, 85748 Garching, Germany.

## Table of Contents

|                              |    |
|------------------------------|----|
| 1. Materials & Methods ..... | 2  |
| 2. Supplemental Data.....    | 8  |
| 3. Sequences & Designs ..... | 14 |
| 3.2 sc_mCherry_0xSV40 .....  | 14 |
| 3.2 sc_mCherry_1xSV40 .....  | 17 |
| 3.3 sc_mCherry_3xSV40 .....  | 20 |
| 3.4 sc_mCherry_6xSV40.....   | 23 |

## 1. Materials & Methods

**Plasmid cloning.** Plasmids encoding for custom scaffolds were created via standard cloning techniques. All plasmids were created via Golden gate assembly using BsaI-HF@v2 (NEB cat. no. R3733), together with T4 DNA ligase (NEB cat. no. M0202). For each plasmid, appropriate cut sites were introduced with PCR (Q5® High-Fidelity 2x Master Mix, NEB, as per manufacturer's protocol), and the assembly was conducted as per manufacturer's protocol. Plasmids were verified using restriction digests and DNA sequencing (Eurofins genomics, Ebersberg Germany).

Touchdown PCR with primers for all constructs are detailed in Table S1. In all cases, PCR products were confirmed by agarose gel electrophoresis (AGE), bands were excised, and fragments were extracted (Qiagen QIAquick Gel Extraction Kit) as per manufacturer's protocol. For the introduction of DTS sequences, custom sequences encoding for the 72 bp SV40 DTS and BsaI cleavage sites were ordered as ssDNA from IDT and were annealed in-house directly prior to the Golden gate assembly reaction.

**Table S1 | Primer sequences used for the construction of the plasmids for mCherry-encoding custom scaffold production.**

| Plasmid                        | Template                | Primer | Sequence 5' - 3'                                                                                                         |
|--------------------------------|-------------------------|--------|--------------------------------------------------------------------------------------------------------------------------|
| sc_mCherry_0xSV40              | Addgene plasmid #126854 | FWD    | CAAGGTGGTCTCCgtgacattaagcgcgcggggtg                                                                                      |
|                                |                         | REV    | CAAGGTGGTCTCCaatgagtgagcaaaaggccagca                                                                                     |
|                                | Addgene plasmid #128744 | FWD    | CAAGGTGGTCTCGcattcgcatgtacgggccaga                                                                                       |
|                                |                         | REV    | CAAGGTGGTCTCGtcacagagccccagctggttctt                                                                                     |
| sc_mCherry_1xSV40              | Addgene plasmid #126854 | FWD    | TTCCGGGTCTCGgtgacattaagcgcgcggggtg                                                                                       |
|                                |                         | REV    | TTCCGGGTCTCGaatgagtgagcaaaaggccagca                                                                                      |
|                                | sc_mCherry              | FWD    | TTCCGGGTCTCCcattgtacgggccagatatacg                                                                                       |
|                                |                         | REV    | TTCCGGGTCTCCATctctagactcgagcggcc                                                                                         |
|                                | sc_mCherry              | FWD    | TTCCGGGTCTCCGcttaaacccgctgatcagc                                                                                         |
|                                |                         | REV    | TTCCGGGTCTCCctcacaggttcttccgcctcaga                                                                                      |
|                                | IDT SV40 seq*           | S1*    | TTCCGGGTCTCCAGATCCGGTGTGGAAGT<br>CCCCAGGCTCCCCAGCAGGCAGAAGTATGC<br>AAAGCATGCATCTCAATTAGTCAGCAACCAA<br>AGCTTGGAGACCAAAGGC |
|                                |                         | S2*    | CCTTTGGTCTCCAAGCTTTGGTTGCTGACTA<br>ATTGAGATGCATGCTTTGCATACTTCTGCCT<br>GCTGGGAGCCTGGGACTTTCCACACCGG<br>ATCTGGAGACCCGGAAA  |
| sc_mCherry_3xSV40_intermediate | sc_mCherry_1xSV40       | FWD    | TTGTGGGGTCTCGgcctgactgtgccttag                                                                                           |
|                                |                         | REV    | TTGTGGGGTCTCGgagcgccgctcactgtacagc                                                                                       |
|                                | sc_mCherry_1xSV40       | FWD    | TTGTGGGGTCTCGgctcgagttagagatccg                                                                                          |
|                                |                         | REV    | TTGTGGGGTCTCGtttggtgctgactaattgag                                                                                        |
|                                | sc_mCherry_1xSV40       | FWD    | TTGTGGGGTCTCGcaaagcttagagatccggtgtg                                                                                      |
|                                |                         | REV    | TTGTGGGGTCTCGgatggttaagcttgggtgct                                                                                        |
|                                | sc_mCherry_1xSV40       | FWD    | TTGTGGGGTCTCGcatccggtgtgaaagtc                                                                                           |
|                                |                         | REV    | TTGTGGGGTCTCGaggctgatcagcgggttaa                                                                                         |
| sc_mCherry_3xSV40              | sc_mCherry              | FWD    | TTCGAGGGTCTCCttgtgacattaagcgcgcc                                                                                         |
|                                |                         | REV    | TTCGAGGGTCTCCcttaccggcccttaga                                                                                            |
|                                | sc_mCherry              | FWD    | TTCGAGGGTCTCGtaaggaggcccggttaaacc                                                                                        |
|                                |                         | REV    | TTCGAGGGTCTCGagccatagagcccaccgcat                                                                                        |

|                   |                            |     |                                       |
|-------------------|----------------------------|-----|---------------------------------------|
|                   | sc_mCherry                 | FWD | TTCGAGGGTCTCGggctcgctttcttctgctgcc    |
|                   |                            | REV | TTCGAGGGTCTCGcatcccagtttagtagttgg     |
|                   | sc_mCherry_3xSV40          | FWD | CAAGAGGGTCTCCatgcggccgctcgagtctag     |
|                   | –<br>intermediate          | REV | CAAGAGGGTCTCCcgaggctgatcagcgggtt      |
|                   | Addgene plasmid<br>#128744 | FWD | AACACCGGTCTCGgactacaacaaggcaaggct     |
|                   |                            | REV | AACACCGGTCTCGacaaagcagcgcaaaacgcct    |
| sc_mCherry_6xSV40 | sc_mCherry_3xSV40          | FWD | GTACACGGTCTCGgactatacgcttgacattgattat |
|                   |                            | REV | GTACACGGTCTCGccaatgagtgagcaaaagccc    |
|                   | sc_mCherry_3xSV40          | FWD | GTACACGGTCTCGttggggatgcggccgctcga     |
|                   |                            | REV | GTACACGGTCTCGagtcgaggctgatcagcgg      |

\*Sequences were annealed and used directly in the Golden gate assembly reaction, as opposed to being used as primers.

**Scaffold production.** The custom scaffolds were produced based on the plasmids described above. A protocol to produce custom scaffolds was presented previously<sup>1,2</sup> and is described in detail in the following section.

For ssDNA production, chemically competent DH5α *E. coli* cells were cotransformed with both the scaffold plasmid of interest, and a helper plasmid (Addgene, # 120346). Transformations were plated on agar plates containing 100 µg/mL carbenicillin and 50 µg/mL kanamycin. After growing overnight, a single colony was picked and grown in a 5 mL pre-culture (2xYT medium, 100 µg/mL carbenicillin, 50 µg/mL kanamycin) at 37 °C with shaking. After turning turbid (~10 h), the pre-cultures were transferred to 2.5 L Ultra Yield flasks (Thomson) containing 750 mL of 2xYT medium (50 µg/mL carbenicillin, 30 µg/mL kanamycin, 5 mM MgCl<sub>2</sub>), and were grown overnight at 37 °C. 50 µL anti-foam (A8311, Sigma-Aldrich) was added per flask to avoid foam formation. The next day, the culture was transferred to 750 mL centrifuge bottles and the bacteria were removed by centrifugation at 4700g for 45 min at 4 °C. The supernatants were transferred to fresh centrifuge bottles where 30 g/L polyethylene glycol 8000 (PEG-8000) and 30 g/L NaCl was added and mixed for 30 min, r.t. to precipitate the phages. Afterwards, the phages were pelleted by centrifugation (1 h, 4700g, 4 °C), and the pellet was resuspended in 4 mL 1xTE buffer. Samples were transferred to 50 mL falcon tubes, and residual bacteria was pelleted by centrifugation (20 min, 15 000g, 4 °C). The supernatant was transferred to a fresh falcon tube and the single stranded DNA was extracted from the phages. First, 10 mL lysis buffer (Qiagen P2, cat. no. 19052) was added and mixed gently by inversion. Afterwards, 7.5 mL neutralization buffer (Qiagen P3, cat. no. 19053) was added and mixed by inversion. Samples were incubated on ice for 15 min, and then centrifuged (25 min, 16 000g, 4 °C). The supernatant was transferred to fresh falcon tubes and ethanol (22.5 mL/tube, 4 °C) was added. The falcon was incubated in an ice water bath for 30 min and centrifuged (20 min, 16 000g, 4 °C) to collect precipitated ssDNA. The ssDNA pellet was then washed with an additional 10 mL 75% ethanol, incubated (10 min, ice water bath), and centrifuged (20 min, 16 000g, 4 °C). The supernatant was carefully removed, and residual ethanol was evaporated, before the pellet was dissolved in 1-2 mL 1xTE. Scaffold concentrations were measured with a NanoDrop™8000

Spectrophotometer (Thermo Scientific) using the absorbance at 260 nm. The size and sequence of the scaffold was verified using agarose gel electrophoresis and sequencing (Eurofins genomics).

**DNA origami design, folding and purification.** Origami objects were designed using caDNAo v0.1 software. All origami objects were folded in standardized ‘folding buffers’ containing  $x$  mM  $MgCl_2$  in addition to 5 mM Tris base, 1 mM EDTA and 5 mM NaCl, pH 8 (FOB $x$ ). All reactions were subjected to thermal annealing ramps in Tetrad (Bio-Rad) thermal cycling devices. Exact folding conditions for each structure is given in Supplementary Table S2 and S3. Staple strands were purchased from Integrated DNA Technologies at 100  $\mu$ M with standard desalting, listed in Supplementary Tables S4–S7. Origami scaffold and staple routing are given in Fig. S7–S10. Origami objects were purified by either PEG precipitation, or gel purification, as previously described.<sup>3,4</sup> When necessary, DNA origami objects were concentrated *via* repetitive filter centrifugation (50 kDa Amicon ultra centrifuge filters, 10,000 $g$ , 2 min) as per manufacturer’s protocol.

**Table S2 | Folding conditions summary for each of the structures and scaffolds used.**

| Scaffold          | Structure | Program | 10x Folding Buffer | v(scaffold, 100 nM,) $\mu$ L* | v(staples, 100 $\mu$ M), $\mu$ L* |
|-------------------|-----------|---------|--------------------|-------------------------------|-----------------------------------|
| sc_mCherry        | 20HB      | 1       | FOB10              | 4                             | 8                                 |
| sc_mCherry_1xSV40 | 20HB      | 1       | FOB15              | 10                            | 8                                 |
| sc_mCherry_3xSV40 | 20HB      | 2       | FOB25              | 4                             | 14                                |
| sc_mCherry_6xSV40 | 20HB      | 5       | FOB15              | 10                            | 8                                 |

\*For 20  $\mu$ L folding reaction, where necessary volume supplemented to 20  $\mu$ L total with ddH<sub>2</sub>O.

**Table S3 | Folding programs used for the folding reactions detailed in Table S2.**

| Program | 1. Denaturation time |        | 2. Temperature ramp   | 3. Storage temperature |
|---------|----------------------|--------|-----------------------|------------------------|
|         | 30 s                 | 15 min |                       |                        |
| 1       | -                    | 65 °C  | 60–44 °C, at 1 °C/1 h | 20 °C                  |
| 2       | -                    | 65 °C  | 60–44 °C, at 1 °C/2 h | 20 °C                  |
| 3       | 70 °C                | 65 °C  | 60–35 °C, at 1 °C/1 h | 20 °C                  |
| 4       | 70 °C                | 65 °C  | 60–35 °C, at 1 °C/2 h | 20 °C                  |
| 5       | -                    | 65 °C  | 60–25 °C, at 1 °C/2 h | 20 °C                  |

**Gel electrophoresis.** For characterization of PCR products and plasmids, 1% agarose gels containing 0.5  $\times$  TBE buffer (22.25 mM tris base, 22.25 mM boric acid, 0.5 mM EDTA) were used. Gel electrophoresis was performed with an identical buffer solution for 1 h at a voltage of 110 V. To characterize folded origami objects and ssDNA scaffolds, we used 2% agarose gels containing 0.5  $\times$  TBE buffer and 5.5 mM  $MgCl_2$ . Gel electrophoresis was performed with an identical buffer solution for 1 – 2 h at a voltage of 90 V, gels were placed in a water bath for cooling. All gels were imaged using a Typhoon FLA 9500 laser scanner (GE Healthcare) with a pixel size of 50  $\mu$ m/pixel.

**Negative staining TEM.** Samples were incubated on glow-discharged copper TEM grids (FCF400-CU, Electron Microscopy Sciences), for 30–60 s. Grids were then stained for 30 s (2% aqueous uranyl

formate, 25 mM NaOH). Imaging was performed at magnifications of 21,000–42,000 $\times$ . Data was acquired with SerialEM software, using a FEI Tecnai T12 microscope (120 kV, Tietz TEMCAM-F416 camera). Images were processed using ImageJ.<sup>5</sup> TEM micrographs were high-pass filtered to remove long-range staining gradients and the contrast was auto-levelled using Adobe Photoshop CS5.

**Cell culture.** HEK293T cells (DSMZ) were cultured routinely in Dulbecco's modified Eagle's medium (DMEM, Gibco, cat. no. 31966047), supplemented with 10% heat-inactivated fetal bovine serum (FBS, Sigma-Aldrich, cat. No. F9665). Cells were grown in a humidified incubator at 37 °C with 5% CO<sub>2</sub>, cells were routinely checked for presence of mycoplasma.

**Cell cycle arrest.** HEK293T cells were arrested for 24 h prior to electroporation using arrest media (DMEM supplemented 10% FBS and 5 ng/ $\mu$ L aphidicolin, Sigma-Aldrich, cat. no. A0781, dissolved in dimethyl sulfoxide, DMSO, Sigma-Aldrich, cat. no. D2438). Cells were kept in arresting media for the entirety of the experiment. For cell cycle arrest with thymidine the cells were treated with DMEM supplemented with 10% FBS and 2.5 mM thymidine (Sigma-Aldrich, cat. no. T1895, dissolved in ddH<sub>2</sub>O) for 16 h, followed by 8 h without in routine growth media, and then a further 16 h of arrest. For cell cycle arrest with hydroxyurea the cells were treated with DMEM supplemented with 10% FBS and 1 mM hydroxyurea (Sigma-Aldrich, cat. no. H8627, dissolved in ddH<sub>2</sub>O), and cells were kept in arresting media for the entirety of the experiment.

In preparation for flow cytometry, arrested and dividing cells were collected via trypsinization and fixed with 2% formaldehyde (20 min, Merck, cat. no. 1.00496.8350). Cells were centrifuged (5 min, 300g) and the cell pellet was washed with DPBS (Dulbecco's phosphate buffered saline, Gibco, cat. no. 14190-094), before being resuspended in DPBS with 0.1% TritonX-100, FxCycle Far Red Stain (200 nM final concentration for 1 x 10<sup>6</sup> cells/mL, Invitrogen cat. no. F10348) and 5  $\mu$ L RNase A (Invitrogen, cat. no. 12091021), and incubated for 30 min, r.t.

**Lipofection.** To transfect the cells using Lipofectamine 2000 (Invitrogen, Thermo Fisher Scientific, cat. no. 11668-027) cells were seeded the day before at a density of 80,000 cells/mL in a 48-well plate either in normal or in arrest media. On the day of the transfection, plasmid was diluted to 100 ng/ $\mu$ L, and 5  $\mu$ L of the plasmid was mixed with 25  $\mu$ L of Opti-MEM (Gibco, Thermo Fisher Scientific). Next, 0.5  $\mu$ L of Lipofectamine 2000 was mixed with 29.5  $\mu$ L of Opti-MEM. The plasmid solution (30  $\mu$ L) was thoroughly mixed into the Lipofectamine solution (30  $\mu$ L) and incubated for 20 min at r.t. Then, 30  $\mu$ L of the mixture was added per well to either arrested or dividing cells. After 24 h, the cells were analyzed by fluorescence microscopy and flow cytometry, as described below.

**Electroporation.** Electroporation experiments were carried out according to the Manufacturer's protocol (Neon™ transfection protocol, ThermoFisher). Briefly, HEK293T cells were washed with DPBS and collected using TrypLE. Cells were pelleted via centrifugation (5 min, 300g), resuspended in DPBS

and counted. Cells were centrifuged again (5 min, 300g), and then resuspended in Buffer R (Neon™ Transfection System) at a concentration of  $5.6 \times 10^6$  cells/mL. Mixtures for each condition were prepared so that each electroporation event contained 0.75 µg total DNA origami, and the volume was supplemented to a total of 1 µL with 1 × FOB5 buffer (folding buffer, 1 mM Tris, 1 mM EDTA, 5 mM NaCl, 5 mM MgCl<sub>2</sub>), which was mixed with 9 µL of the cell suspension. Electroporation occurred in the 10 µL transfection tips, with one pulse at pulse voltage of 1600 V and width of 20 ms. After electroporation, cells were immediately transferred to a 48 well plate which had been pre-prepared with a poly-L-lysine coating, and 240 µL of complete DMEM growth media or arresting media. After 24 h, the cells were analyzed by fluorescence microscopy and flow cytometry, as described below.

**Microscopy and flow cytometry.** After 24 h, samples were imaged using the EVOS™ M7000 Imaging System, and the percentage of mCherry positive cells was quantified via flow cytometry. Briefly, samples were acquired using Attune Nxt Flow Cytometer and software (Thermo Fisher). In total, either 20,000 or 10,000 single cell events for dividing or arrest cells respectively, gated on side scatter area versus height, were recorded for analysis. mCherry was excited with a 561 nm laser and emission was measured with a 620/15 nm bandpass filter. Untreated cells, and cells electroporated with buffer only, were used as negative controls. Cell cycle arrest was confirmed by cell cycle analysis via flow cytometry. The cells were stained with FxCycle™ Far Red Stain (Invitrogen, Thermo Fisher, cat. no. F10348) according to Manufacturer's protocol (and as specified above), the dye was excited with a 638 nm laser and emission was measured with a 670/14 nm bandpass filter. Data was analyzed post-acquisition using FlowJo software (v10.7.1). Exemplary flow gating pathways are given in Fig. S8.

**Statistics and reproducibility.** Statistical analyses were performed with GraphPad Prism (GraphPad Software Inc. v9). The data is illustrated as the mean ± standard deviation, and the individual data points representing biological replicates are shown. The specific analysis performed is detailed in the corresponding figure caption. For all tests, differences were considered significant at  $p \leq 0.05$  (\*),  $p \leq 0.01$  (\*\*),  $p \leq 0.001$  (\*\*\*),  $p \leq 0.0001$  (\*\*\*\*).

## References

- (1) Engelhardt, F. A. S.; Praetorius, F.; Wachauf, C. H.; Brüggenthies, G.; Kohler, F.; Kick, B.; Kadletz, K. L.; Pham, P. N.; Behler, K. L.; Gerling, T.; Dietz, H. Custom-Size, Functional, and Durable DNA Origami with Design-Specific Scaffolds. *ACS Nano* **2019**, *13* (5), 5015–5027. <https://doi.org/10.1021/acsnano.9b01025>.
- (2) Praetorius, F.; Kick, B.; Behler, K. L.; Honemann, M. N.; Weuster-Botz, D.; Dietz, H. Biotechnological Mass Production of DNA Origami. *Nature* **2017**, *552* (7683), 84–87. <https://doi.org/10.1038/nature24650>.
- (3) Stahl, E.; Martin, T. G.; Praetorius, F.; Dietz, H. Facile and Scalable Preparation of Pure and Dense DNA Origami Solutions. *Angewandte Chemie* **2014**, *126* (47), 12949–12954. <https://doi.org/10.1002/ange.201405991>.
- (4) Wagenbauer, K. F.; Engelhardt, F. A. S.; Stahl, E.; Hecht, V. K.; Stömmer, P.; Seebacher, F.; Merigalli, L.; Ketterer, P.; Gerling, T.; Dietz, H. How We Make DNA Origami. *ChemBioChem* **2017**, *18* (19), 1873–1885. <https://doi.org/10.1002/cbic.201700377>.

- (5) Schindelin, J.; Arganda-Carreras, I.; Frise, E.; Kaynig, V.; Longair, M.; Pietzsch, T.; Preibisch, S.; Rueden, C.; Saalfeld, S.; Schmid, B.; Tinevez, J.-Y.; White, D. J.; Hartenstein, V.; Eliceiri, K.; Tomancak, P.; Cardona, A. Fiji: An Open-Source Platform for Biological-Image Analysis. *Nat Methods* **2012**, *9* (7), 676–682. <https://doi.org/10.1038/nmeth.2019>.

## 2. Supplemental Data

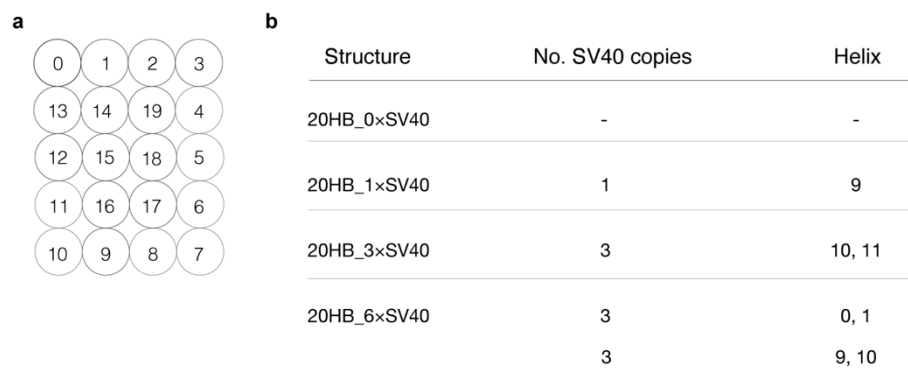

**Fig. S1 | Placement of SV40 DTS sequences in 20HB DNA origami designs.** **a**, Schematic cross section of 20 HB, with helices labeled 0 – 19. **b**, Number of SV40 sequence repeats, and helix within the 20HB that the SV40 sequences feature.

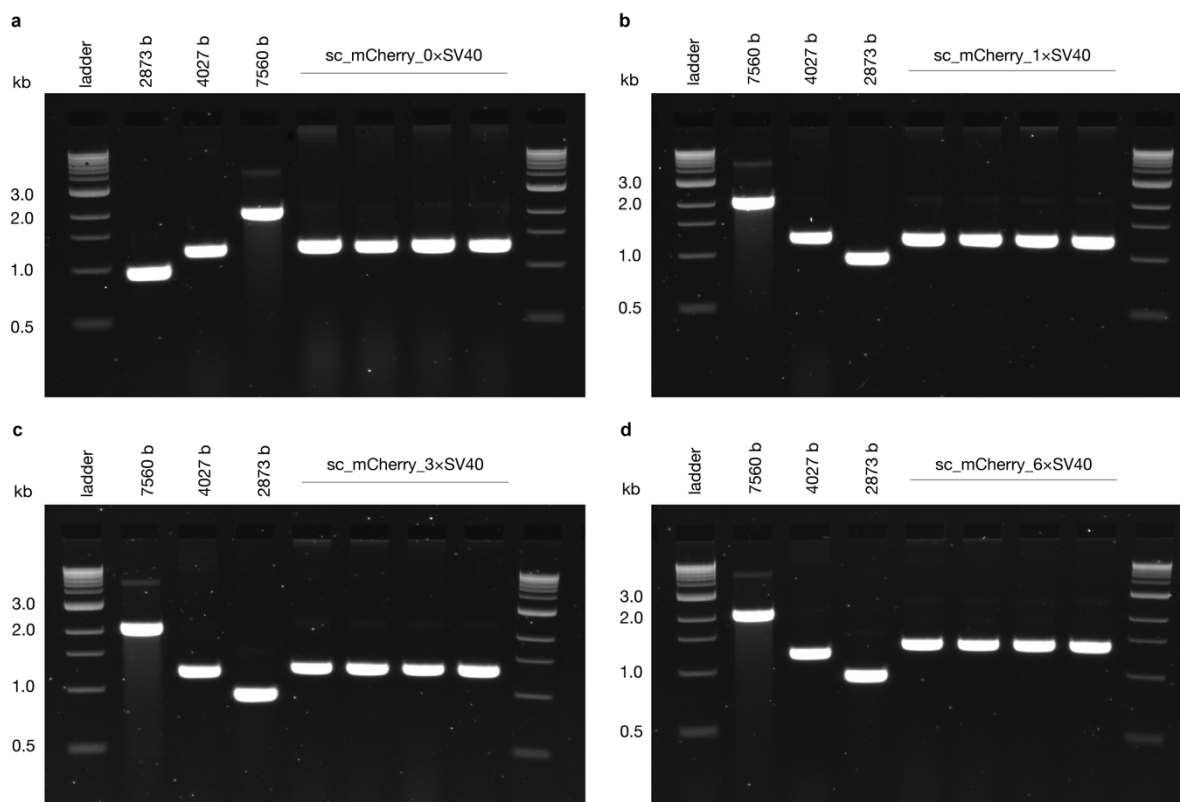

**Fig. S2 | AGE showing all custom scaffolds created in this study.** ssDNA markers at 2873 b, 4027 b and 7560 b were used as molecular weight markers, while 'ladder' depicts NEB 1 kb dsDNA ladder.



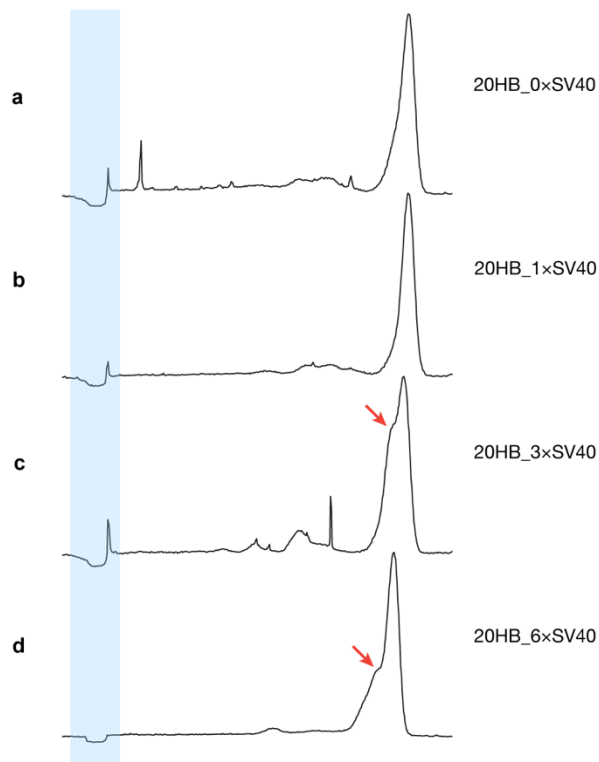

**Fig. S3 | IAGE lane profiles of purified DNA origami objects.** Representative normalized lane profiles for purified origami objects 20HB\_0xSV40 (a), 20HB\_1xSV40 (b), 20HB\_3xSV40 (c) and 20HB\_6xSV40 (d). For reference, the well pocket of each lane is highlighted in blue, and shoulder impurities are demonstrated with an arrow (red).

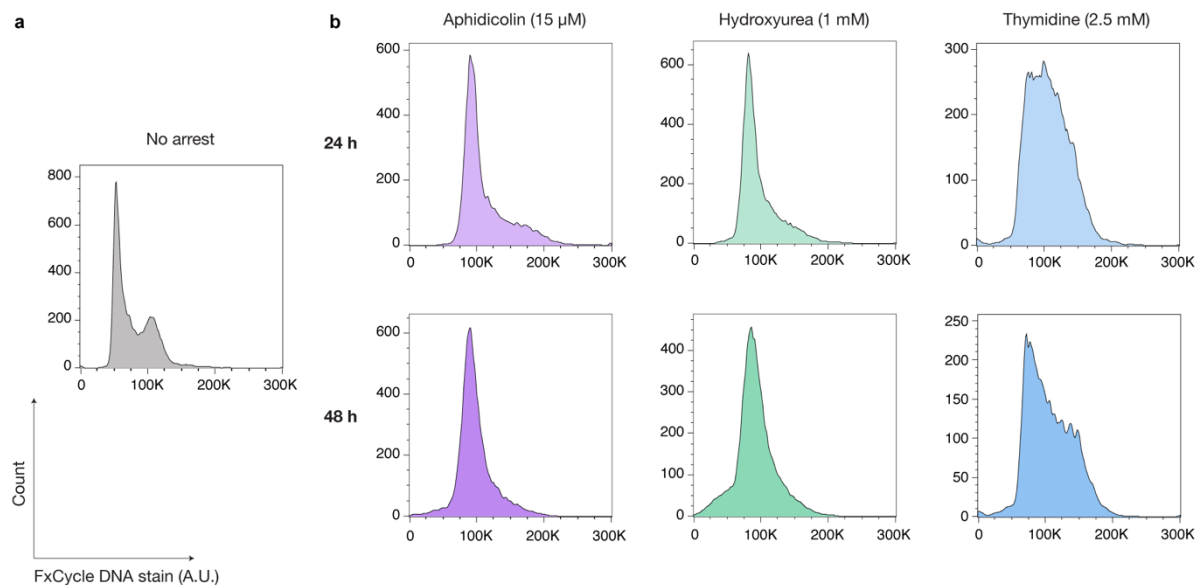

**Fig. S4 | Comparison of different arresting agents.** Cell cycle analysis of untreated HEK293T cells (a) or cells treated with 15  $\mu$ M aphidicolin, 1 mM hydroxyurea or 2.5 mM thymidine for either 24 or 48 h (b). Cells were analyzed by flow cytometry, and the data presented here is representative of  $n = 2$  biologically independent experiments.

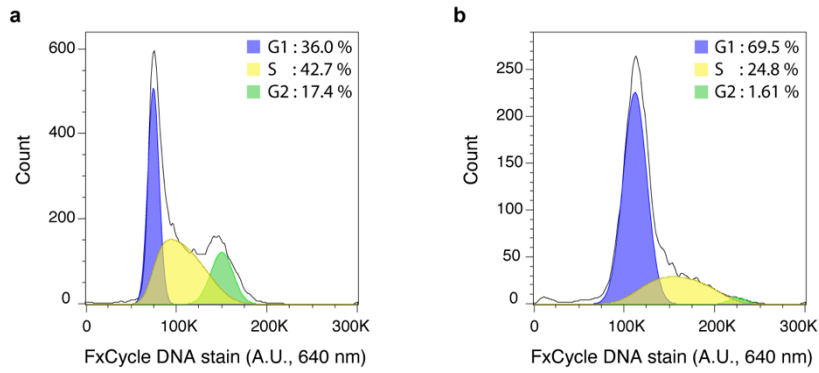

**Fig. S5 | Cell cycle analysis of dividing and chemically arrested cells.** Cell cycle analysis of dividing HEK293T cells (a) and chemically arrested HEK293T cells (b). Cells in G1, S and G2 phases are given in blue, yellow and green, respectively.

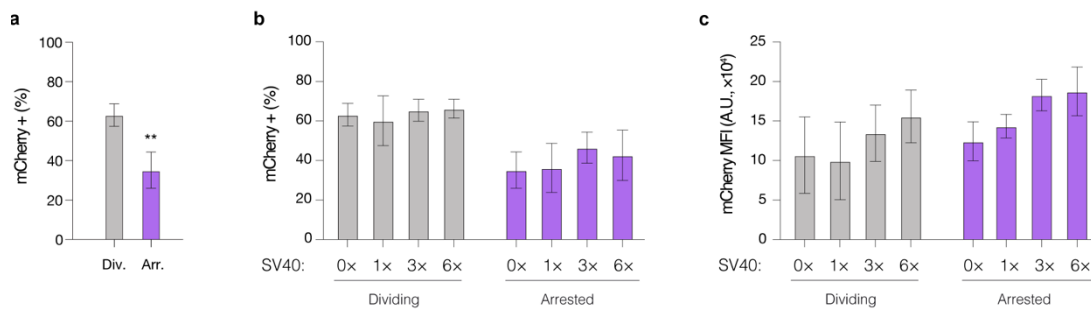

**Fig. S6 | Expression of plasmid DNA in dividing and arrested cells with lipofectamine 2000 delivery.** a, Quantification of mCherry+ cells (%) in dividing and chemically arrested HEK293T populations 24 h after delivery of plasmid DNA corresponding to sc\_mCherry\_0xSV40. b, Percentage of mCherry+ cells and c, mean fluorescent intensity (MFI) of mCherry in dividing and arrested cells after delivery of plasmid DNA variants with lipofectamine. Data for a–c collected were quantified using flow cytometry and are presented as mean  $\pm$  standard deviation (s.d.) for  $n = 3$  biologically independent experiments. Statistical analysis for a was performed using Student's t-test (\*\* $p \leq 0.01$ ), and for b, c statistical analysis was performed using two-way ANOVA with Dunnett's multiple comparisons, no significant difference was observed compared to the corresponding mCherry\_0xSV40 plasmid control.

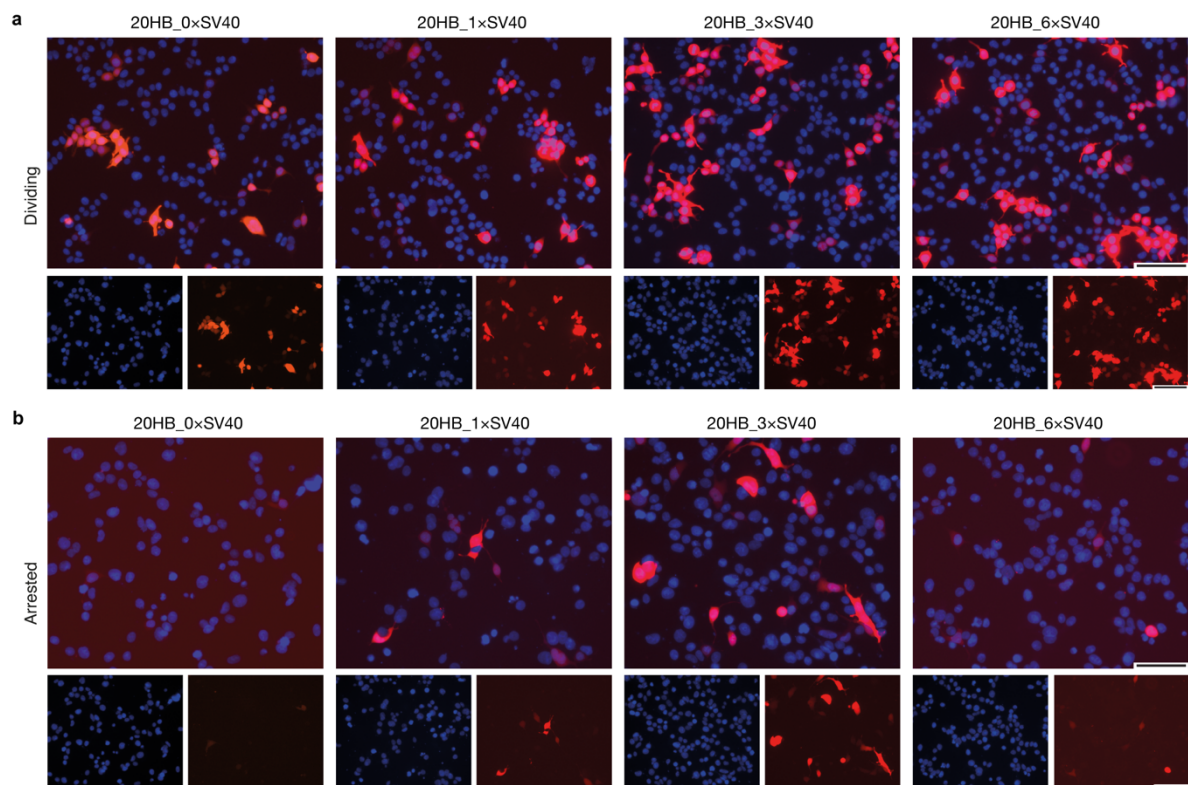

**Fig. S7 | Full panel of representative images corresponding to Fig. 4.** Representative fluorescence microscopy images after electroporation of dividing cells (a) and arrested cells (b) for all 20HB variants. Images were taken 24 h after electroporation and are representative of  $n = 3$  biological replicates (similar results were observed each time). mCherry signal is shown in red, nuclei are shown in blue. Scale bar is 100  $\mu\text{m}$ .

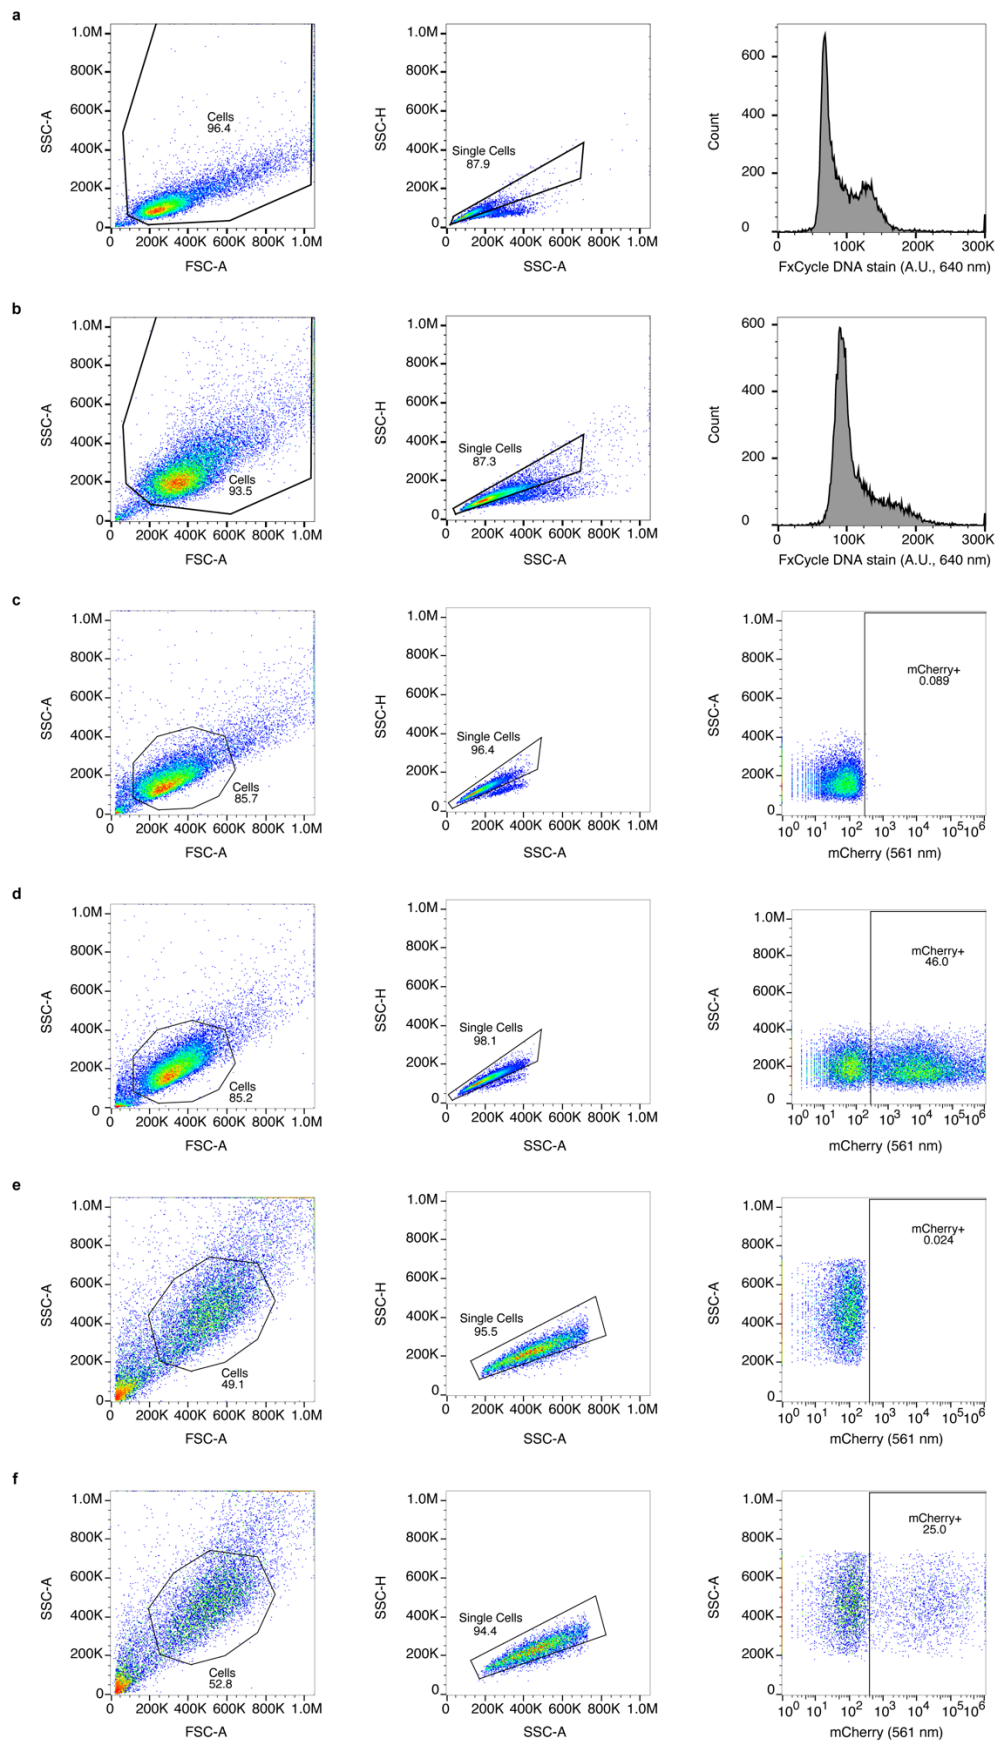

**Fig. S8 | Exemplary flow cytometry gating pathways for HEK293T cells.** From left to right: cell populations were first gated on forward scatter-area (FCS-A) versus side scatter-area (SSC-A), gate 'cells'; single cells were selected by gating SSC-A versus side scatter-height (SSC-H), gate 'single cells'; cells were then assessed per

specific experiment. For arrest experiments the population was plotted for FxCycle DNA stain (A.U., 640 nm excitation) versus total cell count, as demonstrated for dividing (**a**) and chemically arrested (**b**) cells. For mCherry expression experiments, cells were assessed for mCherry expression (561 nm excitation) versus SSC-A. Examples are given for dividing cells (**c** and **d**) and chemically arrested cells (**e** and **f**). Representative gating for negative controls are given in **c** and **e**.



**Corresponding 20HB DNA origami design and staple list for sc\_mCherry\_0xSV40:**

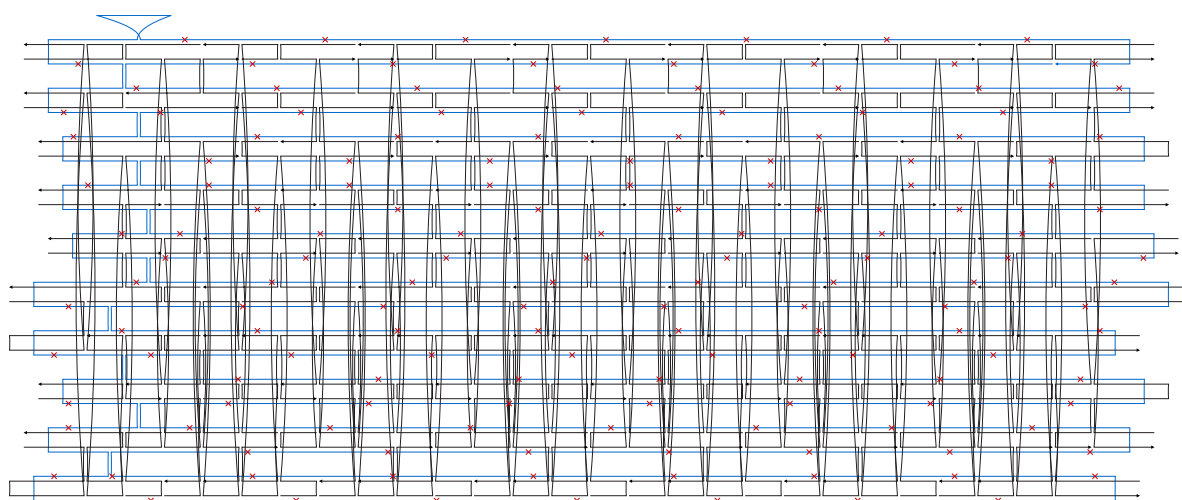

**Fig. S9 | Scaffold routing and staple design for 20HB\_0xSV40.** Scaffold routing is shown in blue, staples are given in black, skips are given as red crosses. Design was prepared using caDNAo v0.1.

**Table S4 | Individual staple sequences for sc\_mCherry 20HB.**

| Name    | Sequence 5' - 3'                                |
|---------|-------------------------------------------------|
| core_1  | CCGCTTACCGGATCCAACATACGTATTTAGA                 |
| core_2  | CTCCCTCGTGCCTCGGGTCGTTATTGTCTC                  |
| core_3  | TATAAAGATACCAGGTTACCGTATTTCAATA                 |
| core_4  | TCAAGTCAGAGGTGGATATGGGCACGGAAAT                 |
| core_5  | CCCCCTGACGAGCAGATTACTAAAAATGCC                  |
| core_6  | CCGCGTTGCTGGCGTTGTCAACGCAGCGTTTC                |
| core_7  | TGGGCGGTCTGTTCGCACATTTCCCGATAGAGCTTGTCATTCT     |
| core_8  | CGGGCCATCGTTTCCCTGTAAGCGTTAATATTAATCGGAGTTGCTC  |
| core_9  | AACTCCATCGAAACCCTTAAATTTTTGTTAAAGTTTTTATACCGCG  |
| core_10 | CCGTAATTTACAAAAACCAATAGGCCGAAATGGCCCACGCTCATCA  |
| core_11 | TAATCAATTTTCCATATAAATCAAAAGAATATCAAAGGGAAACTCT  |
| core_12 | CGTCAATGATGGAAAAACCACCATGAGCGGTCAACCAAGACGGGG   |
| core_13 | GGAAAGTCTTTACCGTTGCAAGCTTATTGAAGGCGACCGAACCTA   |
| core_14 | AACTCCCTGATACAGGATCTCGTTGAATAACGGGATAGGGGTCGA   |
| core_15 | TGAAAATATTGACGTCGGGTCGCAAAAAATTAAGTTACGTGAA     |
| core_16 | CGCCATGGGCATAACACGTTAATGGGTGAGCGGGGCGACGAAAAAC  |
| core_17 | ACCATGGTCAAGTAGGAAAAAGGACTTCAGCAGTTGAGATATTAAGA |
| core_18 | AGCTCTGAACTGAGGAGGGCTTCAGATTT                   |
| core_19 | AGTAAGCGCAGGGGGCTCCCCGTAAGGGCC                  |
| core_20 | CTATAGTGGGCGGTCTCTGTCTATTTTATCCG                |
| core_21 | TAAGTTTATCGCCCTCGTTAATCTGCCGGA                  |
| core_22 | GGACTAGTCGTTACGTATGAGTATTAATAGT                 |
| core_23 | CTCGCCCTTGCTCACCGCGCATGAAAATGAATACAGGCA         |
| core_24 | TCGGGGATACTTGATACTGTTCCACGATGGT                 |
| core_25 | GAAGCCCTCTGCACGCCGGTGGAGTGGCGGC                 |
| core_26 | CGTCTCGCTTGACCTGGCCGCTCACTTGAC                  |
| core_27 | GAGGAGTCTTCAGCTTGCGAGCTTACCCGGC                 |
| core_28 | CACCTTGTTACAGGGCGGAACCTTTAATAGAA                |
| core_29 | TGGGAGGTGATGTCCAGTCGGCGACCGGCTCACCATCTG         |
| core_30 | TGTAGGCGCCGGGCAGCGGGGAAGCCAGCCGCGTGTAG          |
| core_31 | GGCCTTGATAGGTGGTAAGTTCATCTGCAACTTCGTTT          |
| core_32 | TAGTGGCCGCCGTCCTGGGTGTCATAATTGTAGTGAGG          |
| core_33 | GCTTGATCTGCCCTAGATGAACTTCGCCAGAACTTGGT          |
| core_34 | GGGGTACATCCGCTCGGGAAGTTGCCATTGCGTTTTAAA         |
| core_35 | CAAGGCCGTAGTCCCCACGCTCGGGTGCTTTTGGAGCCGTACATG   |

|         |                                                 |
|---------|-------------------------------------------------|
| core_36 | ATCCTCGACCTCGGCTAAACCAGGACAGCTTGTCCCAGGCGAAGG   |
| core_37 | TATGGGCCAGCTCGTCAAGTGGTCCACGCGCGGTACCTTCAGCTT   |
| core_38 | GTTGGACTCCTCTAGACAGTCTATCGGTCACTCGTAGGGGCGGCC   |
| core_39 | GGGCCCTTATTGGACATAAGTAGTCGCCGTCATCTCGAACTCGTGGC |
| core_40 | TCTTCAGGGACTTAGGCGTTGTTGGTGCCGCCCATGTGCACCTTGAA |
| core_41 | AGAATCCAGCGAAAGGCCGTAAGGTGACTGGGCCCCAGT         |
| core_42 | ACGGGCCCGTGTAGCGGCACTGCGAGAATAGATAACTAC         |
| core_43 | AGGCACAGACCCGCCGGCCGCAGTTGCCCGATCCATAG          |
| core_44 | AGGGGCAACTGGTTCTCGGTCTCCACATACACCTATC           |
| core_45 | GCACCTTCCCACCGCCCCATGTTTTGGAACTGACAG            |
| core_46 | TCATTTTTTCCCAATTCCCAACCAAGGATCTCAATCT           |
| core_47 | CGAACGTGACAAATAGTTTGAATGTCATTATTTGGCGTTACTATGGG |
| core_48 | CCCCGATTAAGTGCCTCAGGGTTGGGCGGT                  |
| core_49 | TAAAGCACTTTGTTAATCTTCCTTAGTTATGT                |
| core_50 | CCTAATCAATCAGCTCGGGCGACTATGAACT                 |
| core_51 | AGGGCGATCGGCAAAGGAAGGCTTAATAA                   |
| core_52 | TCCAACGGACCGAGATTTACCCGTATATC                   |
| core_53 | TGAGTACATACATAGGGTTCCGCGACCCTG                  |
| core_54 | TGTATGCGCATTTAACCTAAATCCTGGAAG                  |
| core_55 | GCGTCAATCTCATACAATTCGCGGACAGGAC                 |
| core_56 | GCAGAACTGGGAATAAATTTTTAATCGACGC                 |
| core_57 | ACGTTCTTCAAAAACAATCCCTTAGGCTCCG                 |
| core_58 | TTACCGCTTCTTTACTAGGGTTTAAAAAGG                  |
| core_59 | CCACCCATTGACGTCAGGGCGGAAGCCAGAG                 |
| core_60 | CATAAGGTCATGTACTTGATGTACACCACACT                |
| core_61 | AGTGGGTTTTTTTTGTTAAATACTAGCCAGG                 |
| core_62 | GGATCCGAGAAAACCTGCCAGGCTAGTCAA                  |
| core_63 | ATAATTCTATCAGCAAGCGTTTCGTGTTGACGT               |
| core_64 | ACTCATGGTTCCTCAGGATCAGCGGGTTTAA                 |
| core_65 | CGAGTTACCCTATAAGGACAGTGGGAGTG                   |
| core_66 | GATCAAGGTTGCGCAAGAACAAGCCGTCCTC                 |
| core_67 | ACTGCCAAGTGGGCAGCCGTTGAGATAAGCC                 |
| core_68 | GGGCGTACTTGGCATAATTGACGTGGGTCTCC                |
| core_69 | CGGGCCATTTACCGTCCCCCGTGAACCAAGCT                |
| core_70 | CTTATATACGGCAAACGTCCCTATGACGTCAA                |
| core_71 | AGTCGTAGAAAAAACTTGATGTAACGCGG                   |
| core_72 | AACGCTACTTTTTCTACAATAGGAATGACC                  |
| core_73 | ATGGTGGCGATTATCAAAGTCTGGCCCGT                   |
| core_74 | ATGCTTACCGCGAGACTCGACTATCGGTATTG                |
| core_75 | CTTACTGTTATCCTCGGTGACACTATAGAAT                 |
| core_76 | TGTTATCGAGCGCAGCATGCCGGGCTTCTT                  |
| core_77 | TTGTCAGAGGGCCCATGGCTGGCAACTAGA                  |
| core_78 | CCGATCGCCTCCATCCTCGAGCCAGCGTCCG                 |
| core_79 | AAAGCGGTATAATATAGGAAGCACGGGGG                   |
| core_80 | GTGCAAAAGCTAGAGGCAAGAAACAGCCTCT                 |
| core_81 | TTCATTCTTAGTAGTATGCGATGCAATTTCC                 |
| core_82 | CTTCATAACATGCCATAGCGGGCGAAAGCCGG                |
| core_83 | TAGGGCCCTTATGGCAGTCACGCAAGGGAGC                 |
| core_84 | CTTCTTCAAGTAAGTTCGCTTAAGGTGCCG                  |
| core_85 | TAGTCGAGTAGCTCCTTTCCGCCCATCAC                   |
| core_86 | CTTCAGGGCATGATCCATCCCAGCGTCTATC                 |
| core_87 | GCCCAGTAGCTCCGGTCTCCCCACGTGGAC                  |
| core_88 | CAGGAAAGGGAAAGAAAGATCGACAGACAGCT                |
| core_89 | CTAGGGCGCTGGCAATCTAGCAGAGATAAT                  |
| core_90 | TGCGCGTAACCACCACTCGAGGCTGGCCCTA                 |
| core_91 | TGTCACAGAGCCCCAGACAACAGAGTTTAGTA                |
| core_92 | TCAGAAGCCATAGAGCCAGGGTCACTCGATA                 |
| core_93 | CATGCCTGCTATTGTCATTAGGAATGGGCCCT                |
| core_94 | TCTTGATCGACCTCCCGCCTACCGCCCATTTG                |
| core_95 | GCTGGTAGATACGGGGGACAGGATCAAGTAG                 |
| core_96 | GCGGTGGTCTCTAGTTGTTGTTACGACATTTT                |



|          |                                                                   |
|----------|-------------------------------------------------------------------|
| core_97  | AGCAGATTTGCCTGACCACCCTTTCCCACTT                                   |
| core_98  | TACGCGCATTAAATTTCTTTTGGTGCCAAAACA                                 |
| core_99  | AAGAAGATTGAGCGATGGGTGCCCCACGCCGC                                  |
| core_100 | CCTTTGATGCCAGCTTCAATGGGGTGGAGACT                                  |
| core_101 | TGACGCTCTTACCAATGCCCTCGCTGCAGG                                    |
| core_102 | AGTGGAACGCTCGGTGTCAAACCGCTATCCA                                   |
| core_103 | GGGATTTTAAAGTATAGAGCCCTGCAGCTT                                    |
| core_104 | GGTCATGAGAATTCCTGCCAAAACCGCATC                                    |
| polyT_1  | TTTTTGGCCAGCAAAGGCCAAATGAGTGAAGTATTCTTACCTAGATTTTTT               |
| polyT_2  | TTTTTGCTTTCTCATAGCTCCTTCGGGAGCTACAGAAAAATAAGCGAGAAAGGCTTTCT       |
| polyT_3  | ACATCGCGGGAACCGGAGTGTTGTTCCAGTTTGAATTTTT                          |
| polyT_4  | TTTTTACGTAGATGTAAGTCAATAGCGA                                      |
| polyT_5  | TTTTTAGTTCGGTGTAGGTACGCTGTAAAAAGAGTGTTCCTGAAGTGGTTTTT             |
| polyT_6  | GTTACACACCGTCGCTCCAAGCTGGGCTTTTT                                  |
| polyT_7  | TTTTTGTGTGCACGAACGACTCTGCTGCGTACACTAGAAGGACAGTATTTTT              |
| polyT_8  | TTTTTCTTCTGCATTGATGATGGCCATTTTTTTTTTTGTTATCCTCTGACTAATTTTTT       |
| polyT_9  | TTTTTGCTGCGCCTTATCCGTCTTGAGTTTTT                                  |
| polyT_10 | AGGAATCCCCTCCCAGCCCATGGTCTTTTTT                                   |
| polyT_11 | TTTTTTCTTCAGGGCCCGTCACGCTTTTTT                                    |
| polyT_12 | TTTTTCCAACCGGTATTATCGCCACTGGCAGCAGTTTTT                           |
| polyT_13 | TTTTTATAGAATGACACCTACACCCACCCCCAGATTTTT                           |
| polyT_14 | TTTTTCCACTGGTAAAGAGCGAGGTATTTTTTTTTTTGTAGGCGGTAGCGTGGCTTTTT       |
| polyT_15 | CTTGCTGTCCTGCCCTCAGACATGGACTTAGTCGAGGGGCCCTTTTT                   |
| polyT_16 | TTTTTCAAGAGTCCACTCCAGTTCGGTATGGCTCGTGGT                           |
| polyT_17 | TTTTTGGCCTAACTACGGTTAGC                                           |
| polyT_18 | TTTTTCGTGCTTGTATGTAACCCATTTTTTTTTCTCGTGCACCCAGCAAATTTTT           |
| polyT_19 | TTTTTTTTGGTATCTGAAGCCAGTTTTTTTTTTACCTTCGGAGGTATCTCTTTTT           |
| polyT_20 | TTTTTCCTTTTAAATTAACCTCCTACGGGGCCGTGGAGGGAGGAGGCCAGTTTAGTAG<br>TTG |
| polyT_21 | TGGTAGCGCTGCAATCCCAGGCCACGTCCGTTACGCCGACCTTTTT                    |

### 3.2 sc\_mCherry\_1xSV40

#### Sequence sc\_mCherry\_1xSV40:

gtacgggccagatatacgcgttgacattgattattgactagttattaatagtaaatcaattacgggggtcattagttcatagccatataatggagtccg  
cgttacataacttacggtataatggcccgcctggctgaccgcccacgacccccgccattgacgtcaataatgacgtatgtcccataagtaacg  
ccaatagggactttccattgacgtcaatgggtggagattttacggtaaaactcccacttggcagtacatcaagtgatcatatgccaagtacgcc  
ccctattgacgtcaatgacggtaaatggcccgcctggcattatgccagtacatgacattatgggactttcctacttggcagtacatctacgtatta  
gtcatcgtattaccatggtgatgctgggtttggcagtacatcaatgggctggtatagcgggttgactcacgggattccaagtctccacccattg  
acgtcaatgggagttgtttggcaccaaaatcaacgggactttccaaaatgtcgtaaactccgccccattgacgaaaatgggctggtaggc  
gtgtacggtgggaggtctatataagcagagctctctggtaactagagaacccactgctactggtatcgaataatagcactcactatagg  
gagaccaagctggctagcgttaacttaagcttgtagcagctcggtagcactagtcagtggtggaattcgccaccatggtgagcaa  
gggagaggagataacatggccatcatcaaggagttcatgcttcaaggtgcacatggagggctccgtgaacggccacgagttcgagatc  
gagggcgagggcgagggcccccacgagggcaccagaccgcaagctgaagtgaccaagggtggccccctgcccttcgctggg  
acatcctgtcccctcagttcatgtacggctccaaggcctacgtgaagcaccggccgacatccccgactactgaagctgtcctccccgaggg  
ctcaagtgaggagcgcgtgatgaacttcgaggacggcggcgtggtgaccgtgaccaggactcctcctgcaggacggcagttcatctaca  
aggtgaagctgcgcggcaccactcccctccgacggccccgtaatgcagaagaagaccatgggtgggagggcctcctccgagcggatg  
accccgaggagcggcgcctgaagggcgagatcaagcagaggtgaagctgaaggacggcgcactacgagctgaggtcaagacca  
cctacaagccaagaagcccgtgcagctgcccggcgcctacaacgtcaacatgagttggacatcacctcccacaacgaggactacacca  
tcgtgaacagtagcaagcgcggcagggccgcccactccacggcgcctacgtgacagagctgtacaagtgacggcggcgtcaggtctagagA  
TCCGGTGTGGAAGTCCCAGGCTCCCCAGCAGGCAGAAGTATGCAAAGCATGCATCTCAATTA  
GTCAGCAACCAAAGCtttaaacccgctgacagcctcactgtgcttctagttgccagccatctgtttgccccctccccgtgcttcc  
ttgacctggaaggtgcccactcccactgtcctttcctaataaaatgaggaaattgacatgcattgctgagtaggtgtcattctattctgggggtg  
ggtggggcaggacagcaagggggaggattgggaagacaatagcaggcatgctggggatgctgggtggtctatggtctgagggcggaaa  
gaacctgtgacattaagcggcgggtgtggtggttacgcgcagcgtgaccgtacacttgcagcgcctagcggcctccttctgcttctt  
cccttcttctcgcacggtcggcgttccccgtcaagctcaaatcggggctcccttaggggtccgatttagtgcttacggcacctcgacc  
caaaaactgattaggggtatggttcacgtagtggccatcgcctgatagacgggttttcgcccccttgacgttgagtcacagttcttaatagtg  
gactctgttccaaactggaacaactcaaccctatctcgtctattcttttgattataagggattttgcccatttcggcctattggttaaaaaatga

gctgatttaacaaaaatthaacggaatttaacaaaatattaacgcttacaatttaggtggcactttcgggaaatgtgcggaaccctattt  
gtttatitttctaatacattcaaatatgtatccgctcatgagacaataaccctgataaatgctcaataatattgaaaaggaagatgagattc  
aacatttccggtgcgccctattccctttttgcgccattttgcttctgtttttgctcaccagaaacgctggtgaaagttaaagatgctgaagatca  
gttgggtgcacgagtggttacatcgaactggtatcacaacagcggtaagatcctgagagttttgccccgaagaacgtttccaatgatgagca  
cttttaagttctgctatgtggcgggtattatcccgtattgacccgggcaagagcaactcggctcggcatacactatttctcagaatgacttggt  
gagtactaccagtcacagaaaagcatcttacggatggcatgacagtaagagaattatgcagtgctgcataacctagtgataaactgc  
ggccaacttactctgacaacgatcggaggaccgaaggagtaaccgctttttgcacaacatgggggatcatgtaactcgccttgatcgttg  
gaaccggagctgaatgaagccataccaacgacgagcgtgacaccacgatgctgtagcaatggcaacaacgttgcgcaactattaact  
ggcgaactactactctagcttcccggcaacaattaatagactggtgaggcggataaagtgcaggaccacttctgcgctcggccctccgg  
ctggctggtttattgctgataaatctggagccggtgagcgtgggtctcgggtatcattgcagcactggggccagatggtgaagccctcccgtatc  
gtagtatctacacgacggggagtcaggcaactatggatgaacgaaatagacagatcgtgagataggtgcctcactgattaagcattggtaa  
ctgtcagaccaagttactcatatatacttttagattgatttaaactcatttttaattaaaaggatctaggtgaagatccttttgataatctcatgacc  
aaaatcccctaacgtgagtttctcactgagcgtcagaccccgtagaaaagatcaaggatctcttgagatcctttttctgcgctaatctgc  
tgctgcaaaaaaaaccaccgctaccagcgggtgtttgtttgcccggatcaagagctaccaactcttttccgaaggtaactggctcagcag  
agcgcagataccaataactgcttctagtgtagccgtagttaggccaccactcaagaactctgtagaccgctacatacctcgtctgcta  
cctgttaccagtggtcgtcggatgagcgtgcttaccgggttgactcaagcagatagttaccggataaggcgcagcggctcggg  
ctgaacggggggtcgtgcacacagcccagctggagcgaacgacctacaccgaactgagatacctacagcgtgagctatgagaagcgc  
cacgctcccgaagggagaaaggcggacaggtatccggaagcggcagggctggaacaggagagcgcacgagggagctccagggg  
aaacgctggtatctttagtctgctgggttccgacactcgtactgagcgtgattttgtgatgctcgtcagggggcggagcctatggaa  
aacgccagcaacgcggccttttacggttctgctgtttgtgctcactcatt

**Corresponding 20HB DNA origami design and staple list for sc\_mCherry\_1xSV40:**

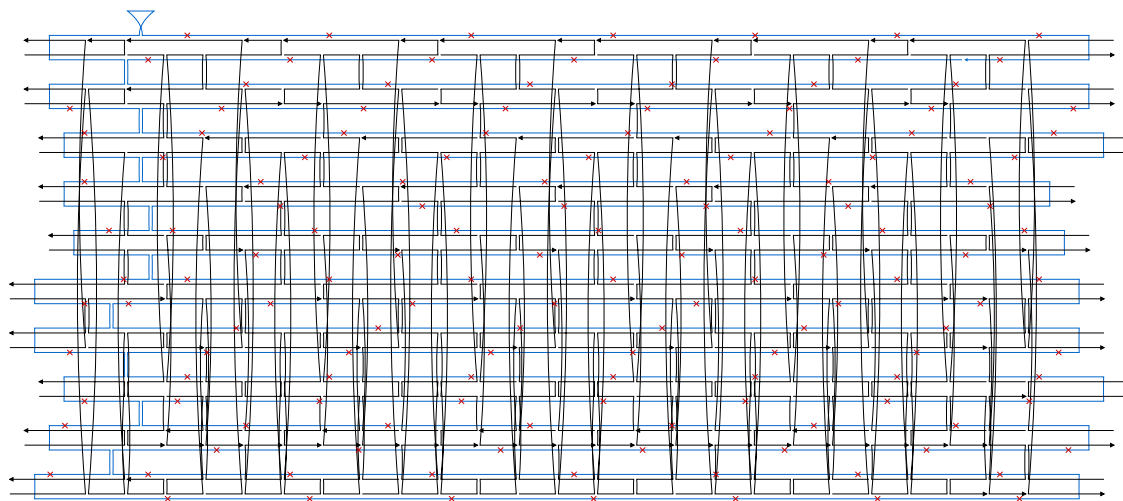

**Fig. S10 | Scaffold routing and staple design for 20HB\_1xSV40.** Scaffold routing is shown in blue, staples are given in black, skips are given as red crosses. Design was prepared using caDNAo v0.1.

**Table S5 | Individual staple sequences for sc\_mCherry\_1xSV40 20HB.**

| Name    | Sequence 5' - 3'                                          |
|---------|-----------------------------------------------------------|
| core_1  | TGACGTCACCTTCCGAAAAAGATACGGGA                             |
| core_2  | CAGCCAGTAAGGGCGACAAACCGCCTGACGGTCTGGACTGAGGGGACAGGA       |
| core_3  | GTAACGCGCAGGAAGGTTTGCAAGCGATCTCCCTCGCTGCTTACGTAGGCC       |
| core_4  | CTAATGACACTTTCAAAGGATACCAATGCTTCACGGACAGCTTCAAGTAGTCG     |
| core_5  | ACTAGTCATCGTGCACACTACGGGGAGTATATAGCATGAACCGCGCTCCCACTTGAA |
| core_6  | CTGGCCCCGCGTGTGCTCACGTTAAATTAACCTCCTCGGTCACCACGCCGCCGT    |
| core_7  | TTGGGCTTCCGGCAAACACGGAACCTTACTCGTGAACCAACCCTAAAGGGAGC     |
| core_8  | TCCACCCAGTTTTTTTGAAAATGTTCTGTGAAAAACCGGACGGGGAAAGCCGG     |
| core_9  | TACTGCCACAGAAAACCAGCGTTTTCTGAGATAAAGAACAGGAAGGGAAGAAAGC   |
| core_10 | GGGGCGTAATCTTTTCCCAACTGGCTCTTGTTGTTCTAGGGCGCTGGCAAGT      |
| core_11 | GCGGGCAAACGAAAAAGATCCACGCGCAATCAAAGCGCGTAACCACCACAC       |
| core_12 | TACACGCCTACCGCCAGCTTGGCTCCCCGTCTGATACCG                   |
| core_13 | AGAGAGCTCTGCTTATGGCCCTCGGTCTATTAGATTTAT                   |

|         |                                                         |
|---------|---------------------------------------------------------|
| core_14 | GCCAGTAAGCAGTGGGTGGCCGTTAATCAAGGGCCGA                   |
| core_15 | TCCCTATAGTGAGTCTTGAAGCTGAGTAATATCCGCC                   |
| core_16 | GCTTAAGTTTAAACGTGTTATCAATGAAGTCCGGGAAG                  |
| core_17 | GCGAAGGGACCCTTGGTCACCTTCATTTGCGT                        |
| core_18 | GTACATGAGTGCCCTCGTAGGGGCATAGACCT                        |
| core_19 | CGGCGGGGCCTCGATCTCGAACTCGTTCTCTA                        |
| core_20 | GGGAAGGAGCCCTCCATGTGCACCGTATTAAT                        |
| core_21 | TTCATCATCCTTGATGATGGCCACTAGCCAG                         |
| core_22 | GGTCACGCCTTGCTCACCATGGCCGAGCTCTTGGTCA                   |
| core_23 | TCAGCCTAGGTGGTCTTGACCTCCGGGGGAG                         |
| core_24 | GCCGTCCCCGGGCAGCTGCACGGACTAGAA                          |
| core_25 | GCCTCCCGATGTCCAACCTTGATGGTTTTAAA                        |
| core_26 | ACGGGGCCCACGATGGTGTAGTCTGCATGC                          |
| core_27 | GCAGCTTCAGTGGCGGCCCTCGGGAGCCTGG                         |
| core_28 | TAGTTATCGCGCCTGGCCGCCGTCCTCAGCTTGCCCAGGCTGCAA           |
| core_29 | GCCTTGCTGCTTGATCTCGCCCTTCAGGGCTTGAGCCCCGGCTCC           |
| core_30 | GTAGGCGTCGGGTACATCCGCTCGGAGGAGGGGATGTCAGCCGGA           |
| core_31 | GGGAGGTAGCCCATGGTCTTCTTCTGCATTGCCCTCGTGCAACTT           |
| core_32 | TACTGTTTCGTCGGAGGGGAAGTTGGTGCCGCCCTCGAAGAATTGTTG        |
| core_33 | GGTCGGTACAACCCAAGGAAGGCAAGCGTCGGCCCCAGT                 |
| core_34 | AGGAAAGGCAACAGATGGCTGGCAGCTTCTTGACGCTCA                 |
| core_35 | GACAATGCGAGGCTGATCAGCGTTGACGTTAACCAGC                   |
| core_36 | CCACCCCTGCTGACTAATTGAGACTCGTTGTGTGGTCC                  |
| core_37 | CCAATCCCTTCTGCCTGCTGGGCGCGTTCGAGTCTATT                  |
| core_38 | CCGCATCCCACACCGGATCTCTATCCATGCCAAGTAGTT                 |
| core_39 | TGTAGGCGTTTTTCAATTTTTTGGGCCTATGGATGGTTAAACCATCTG        |
| core_40 | TATCAGGGTTATTGTGCGCCACTAGTCATGCCAGAAGTACGAGACCC         |
| core_41 | TATTTGAATGTATTTAAAAGGGCGCTGGTGACGGTTAGCCAGCAATA         |
| core_42 | AGGGGTTCCGCGCACTCCACTATATAGTGTGTTACATGGCGCAGAA          |
| core_43 | CCACCTAAATTGTAAGGTTGAGTCCCGCGTATTCAGCTTCCATCC           |
| core_44 | AAAATTCGCGTTAAACTTATAACATAGCAGTGGTGTCACTAGAGT           |
| core_45 | TACTCATAATGGGCGGAACATACGTCATTAT                         |
| core_46 | AAGGGAAGCGGGCCACAATGGAAAGTCCCTATGATTTTG                 |
| core_47 | AGCAAAAAGAAGTCCAAGTTTACCGTAAATACCGTCAATG                |
| core_48 | CATCTTTTCCCGTAATATGATACACTTGATGTGAGTCAA                 |
| core_49 | TAACCCACATAATCAACATTGACGTCAATAGTACTGCC                  |
| core_50 | GATCTTACTACAATGATGGGCATAATGCCAGCGATGAC                  |
| core_51 | CTCTCAAGAAATCAGCGTAAAAAGGCCGCGTTGCTGGCGT                |
| core_52 | CAGCACTAAGTACGAGTTGGTACAATGGGTACGACATTTTGGAAAGTCCCGT    |
| core_53 | CATCCGTACCATAGTTACCGCTGGCCACCGGTGCCAAAACAACTCCCATTGA    |
| core_54 | GTAACAACCTATCTCAGCAGCAGGTTAGCCGGGTGGAGACTTGGAAATCCCCG   |
| core_55 | ATGCGGCGTGACAGTTTCAAGAAGTTCGATAAACCCTATCCACGCCATTGATG   |
| core_56 | CAATACGGCAATCTAATCTGACGCCTTGGGTCAAACCGCATCACCATGGTAATAG |
| core_57 | CGCAGGTAAATCGGATCACCTAATCAAGTATTATTG                    |
| core_58 | AGTTGGCGGGCAAAACAGTGGGAGTGGCACCTTCCAGTAAAGCACTATCACTC   |
| core_59 | TCCTCCGTAGAGCTTTCTATCAGGGCGATGTCATGAG                   |
| core_60 | TCCTTCGGGGCACAGTCGATGCAATTTCTCATTTTTATTCCCCGATTATCGTTGT |
| core_61 | TGTTGTGGCGAGAAGTGGACTCCAACGTCGAAAAAT                    |
| core_62 | ATCCCCAGCTTTGGTCCAGAATAGAATGACACCTACTCACGAACGTGCAAAAAAG |
| core_63 | CAACGATCCGGGCGCAGTTTGAACAAGAGATTTCCCC                   |
| core_64 | CCGTTTCTTTGCATATCCCCCTTGCTGTCTGCCCCACCGAAAGGAGAAGGCGA   |
| core_65 | GTTTGGTACACGCTGAATAGACCGAGATAGGCGTTAAT                  |
| core_66 | CGCTCGTCGGACTTTCCAGCATGCCTGCTATTGTCTTCGTAGCGGTTGGCTTC   |
| core_67 | GGCATCGAACTTTAAATCCTTTTAAAGGGATT                        |
| core_68 | TTGCTACAGCTTAATGGAAATCGGCAAAATCCTTTTTGTT                |
| core_69 | GTGTAGATGCATAATTATGTTGAAAAGCATTCCGACCCTGCCGCTTACCGGGTC  |
| core_70 | TCGTTTCATAGATGCTTCCGCAAAACGGATACACCCTGGAAGCTCCCTCGTGCCT |
| core_71 | GTGAGGCACCAAGTCATCTGGGTGAAACAAATCGACAGGACTATAAAGATACCAG |
| core_72 | ACTTGGTCACCGAGTTATCTTCAGGAAAAGTGAATCGACGCTCAAGTCAGAGGTG |
| core_73 | TTTAAATGATAATACGTTTCGATGATTTTGTAGGCTCCGCCCCCTGACGAGC    |
| core_74 | GCTCTTGATACTATGGGGGGTTCGTTGGGCGGTCTCCTGTT               |

|          |                                                       |
|----------|-------------------------------------------------------|
| core_75  | TAGCGGTGTTGACGTTTTACCGTAAGTTATGCGTTTCC                |
| core_76  | ATTACGCGAGTGGGCTATATGGGCTATGAAGCGAAACC                |
| core_77  | ATCCTTTGCTTGGCATTGATTACTATTAATAATCACAAA               |
| core_78  | TCAGTGGATTTACCGTTGTCAACGCGTATATTTTTCCA                |
| polyT_1  | TTTTTAGGCCAGGAACCTCATTFFFFFFTTTTT                     |
| polyT_2  | TTTTTGAAGCGTGGCGCTTTCGCCTTTC                          |
| polyT_3  | TCATGTACGTGAGCAAAAGGCCAGCAAATTTTT                     |
| polyT_4  | TTTTTAAGTCCCATAAGGTGAGATTATCATTFFF                    |
| polyT_5  | TTTTTAGGTATCTCAGTTCCTCATAGCTACCTTCGGTGCTACAGAGTTTTFFF |
| polyT_6  | GGTGTGTGCGGAGTAGGTGCTTCGCTCTTTTT                      |
| polyT_7  | GGTACCAATAATACGTAGATGTACTGCCAAGTAGGATTTTT             |
| polyT_8  | TTTTTACTGGACTAGTGGATTGGCGAATTCCACCCTTTTT              |
| polyT_9  | TTTTTCAAGCTGGGCTGTGGGGGTATCTGCGCTCTGTTTTT             |
| polyT_10 | GTGGGCCAGGGCACGAACCCCCCGTTTTTTTT                      |
| polyT_11 | TTTTTGGGAGGAGTCTGCGCCAGTTCACCTAGAAGTGCTC              |
| polyT_12 | TTTTTCAGCCCGACCGCTCGGTAACCTATTTTTT                    |
| polyT_13 | GCCGGTGGACCTTGTAGATGAACTCGCCGCTCCTGCATTTTT            |
| polyT_14 | TTTTTCACTTGTACAGCTCGGACTCGAG                          |
| polyT_15 | TTTTTCGTCTTGAGTCAGACACGACTTATCGCCATTTTT               |
| polyT_16 | TTTTTTCCGCCTCAGAAGCCATAGAGCCACC GCCGC                 |
| polyT_17 | TTTTTCTGGCAGCAGCAGGATTAGCATTTTTT                      |
| polyT_18 | TTTTTACCAATAGGCCTCACAGGTTCTTTTTT                      |
| polyT_19 | TTTTTGAGCGAGGTATCCCTTCGTTTTT                          |
| polyT_20 | TTTTTCTTCGGGGCGAAAATCATTGGAAAACGTTTTTT                |
| polyT_21 | TTTTTCTTGAAGTGGTGGGTGGTAACCACTCGAGGTGCCG              |
| polyT_22 | TTTTTAACGTTGTTGCCACGGCCGCTTTTTT                       |
| polyT_23 | TTTTTAAGGACAGTATTTCTTCTACGGCTACACTAGTTTTT             |
| polyT_24 | TTTTTAAAAGGATCTTAATAGTTTGCGCTTTTTT                    |
| polyT_25 | TTTTTCTGAAGCCAGTTCACGCTGTTTTT                         |

### 3.3 sc\_mCherry\_3xSV40

#### Sequence sc\_mCherry\_3xSV40:

cgcgatgacgggcccagatatacgcgttgacattgattattgactagtattataatagtaatacaattacggggcttagttcatagcccataatgga  
gttccgcgttacataaacttacggtaaatggcccgcctggctgaccgccaacgacccccgccattgacgtcaataatgacgtatgtcccata  
gtaacgccaatagggactttccattgacgtcaatgggtggagatttacggtaaactgccactggcagtacatcaaggtatcatatgccaagt  
acgccccctattgacgtcaatgacggtaaatggccgcctggcattatgccagttacatgacctattgggactttcctactggcagtacatctac  
gtattatgcatcgctattaccatgggtgatcggttttggcagttacatcaatgggctggatagcggtttgactcacggggattccaagtccacc  
ccattgacgtcaatgggagttgttttggcaccaaaatcaacgggactttccaaaatgctgaacaactccgcccattgacgcaaatggcggt  
aggcgtgacgggtgggaggtctatataagcagagctctctggtaactagagaaccactgcttactggcttatcgaaattaatacactactacta  
tagggagaccgaagctggctagcgtttaaacttaagcttggtagcagctcggatccactagtccagtggtggaattcgccaccatggtgag  
caaggcgaggaggataacatggccatcatcaaggagttcatgctgctcaaggtgcacatggagggtccgtgaacggccacgagttcga  
gatcgagggcgaggggcagggccgcccctacgagggcaccagaccgccaagctgaaggtgaccaaggggtggccccctgccttcgcc  
tgggacatcctgtcccctcagttcatgacggctccaaggcctacgtgaagcaccgcccagatccccgactactgaagctgtccttccccg  
agggcttcaagtgaggagcgcgtgatgaactcaggagcggcggcgtgaccgtgaccaggactcctccctgcaggacggcgagttcat  
ctacaaggtgaagctgcgggcaccactcccctccgacggccccgtaatgcagaagaagaccatggggtgggagggcctcctccgagcg  
gatgtaccccaggagcggcgcctgaagggcgagatcaagcagaggctgaagctgaaggacggcgccactacgacgctgaggtcaa  
gaccacctacaaggccaagaagcccgtgcagctgcccggcgctacaacgtcaacatcaagttggacatcacctcccacaacgaggact  
acaccatcgtggaacagtacgaacgcgagggccgccaactccaccggcgcatggacgagctgtacaagtgagcggccgctcagctg  
tagagggccgggtaaggaggggcccgtttaaaccgctgatcagcctcagctgtgcttctagtggcagccatctgttttggccctccccgtg  
ccttcttgaccctggaaggtgccaactcccactgtccttcttaataaaataggaaattgcatgcattgtctgagtaggtgtattctattctggg  
gggtggggtggggcaggacagcaagggggaggattgggaagacaatgacggcatgctggggatgctgggtggtctatggtcgtcttctg  
ctgtccaattctattaaaggttctttgtccctaagtccaactactaaactggggatgcccggcctcgagctagagATCCGGTGTGGA  
AAGTCCCCAGGCTCCCCAGCAGGCAGAAGTATGCAAAGCATGCATCTCAATTAGTCAGCAACCA  
AAGCTctagagATCCGGTGTGAAAAGTCCCCAGGCTCCCCAGCAGGCAGAAGTATGCAAAGCATGC  
ATCTCAATTAGTCAGCAACCAAAGCtttaaacATCCGGTGTGAAAAGTCCCCAGGCTCCCCAGCAG  
GCAGAAGTATGCAAAGCATGCATCTCAATTAGTCAGCAACCAAAGCtttaaacccgctgatcagcctcgactac  
aacaaggcaaggctgaccgacaattgcatgaagaatctgcttagggtaggcgttttgcgctgctttgtgacattaagcggcggggtggtg

gttacgcgacggtgaccgctacactgccagcgccctagcgccgctcctttcgcttttccctcctttctcgccacggtcgccggttccccgt  
caagctctaaatcggggctccctttagggttccgatttagtgcttacggcacctcgacccccaaaaaactgattagggtgatggtcacgtagt  
gggcatcgccctgatagacgggttttcgccccttgacgttgaggccacgttcttaatagtgactctgttccaaactggaacaactcaacc  
ctatctcggctattctttgattataagggttttgcgatttcggcctattggttaaaaaatgagctgatttaacaaaaatlaacgcaatlaaca  
aaatattaacgctacaatttagtggtcacttttcggggaatgtgcggggaaccctatttgtttttctaaatacatlcaaatatgatccgctca  
tgagacaataaccctgataaatgctcaataatattgaaaaggaagatgagattcaacatttccgtgctgccttattccctttttgcgcat  
ttgcttctgcttttctcaccagaaacgctggtgaaagttaaagatgctgaagatcagttgggtgcacgagtggttacatogaactggatct  
caacagcgtaagatccttgagagtttgcggcgaagaacgtttccaatgatgagcacttttaagttctgctatgtggcgcggtattatccgt  
attgacgcccggcaagagcaactcggtcgccgcatacactattctcagaatgactggtgagtagtaccagtcacagaaaagcatcttacg  
gatggcatgacagtaagagaattatgagtgctgcataaccatgagtgataacactgggccaacttacttctgacaacgatcggaggacc  
gaaggagtaaccgctttttgcacaacatgggggatcatgtaactgccttgatggtgggaaccggagctgaatgaagccataccaaacga  
cgagcgtgacaccagatgctgtagcaatggcaacaacgttgcgcaactattaactggcgaactacttacttagcttccggcaacaatt  
aatagactggatggaggcgataaaagttgcaggaccacttctgcgctcgccctccggctggctggtttattgctgataaatctggagccggtg  
agcgtgggtctcgcggtatcattgcagcactggggccagatggaagccctccgtagctgtagttatctacacgacggggagtcaggcaactat  
ggatgaacgaaatagacagatcgctgagataggtgcctcactgattaagcattggaactgacagaccaagttactcatatatactttagattga  
tttaaacttattttaaattaaaggatctaggtgaagatccttttataatctcatgacaaaatcccttaacgtgagtttctgctcactgagcgtc  
agacccgtagaaaagatcaaaggatctctgagatcctttttctgcgctaactgctgctgcaacaaaaaaaccaccgctaccagcgg  
tggtttgttgcggatcaagagctaccaactctttccgaaggtaactggctcagcagagcgcagataccaaatactgcttctagtgtagcc  
gtagttaggccaccactcaagaactctgtgacccgctacatacctgcctgctaactctgttaccagtggtgctgctccagtgccgataagtc  
gtgcttaccgggttgactcaagacgatgttaccggataaggcgcagcggctcgggctgaacggggggtcgtgcacacagcccagcttg  
agcgaacgactacaccgaactgagatacctacagcgtgagctatgagaaagcggcagctcccgaaggagaaaggcggacaggta  
tccgtaagcggcagggtcggaaacaggagagcgcaggggagctccaggggaaacgctggtatctttagtctgctggttccgccc  
acctgactgagcgtcgattttgtgatgctcgtcagggggggcggagcctatggaaaaacgccagcaacgggccttttacggttctgctgct  
ttgctggcctttgctcactcatt

**Corresponding 20HB DNA origami design and staple list for sc\_mCherry\_3xSV40:**

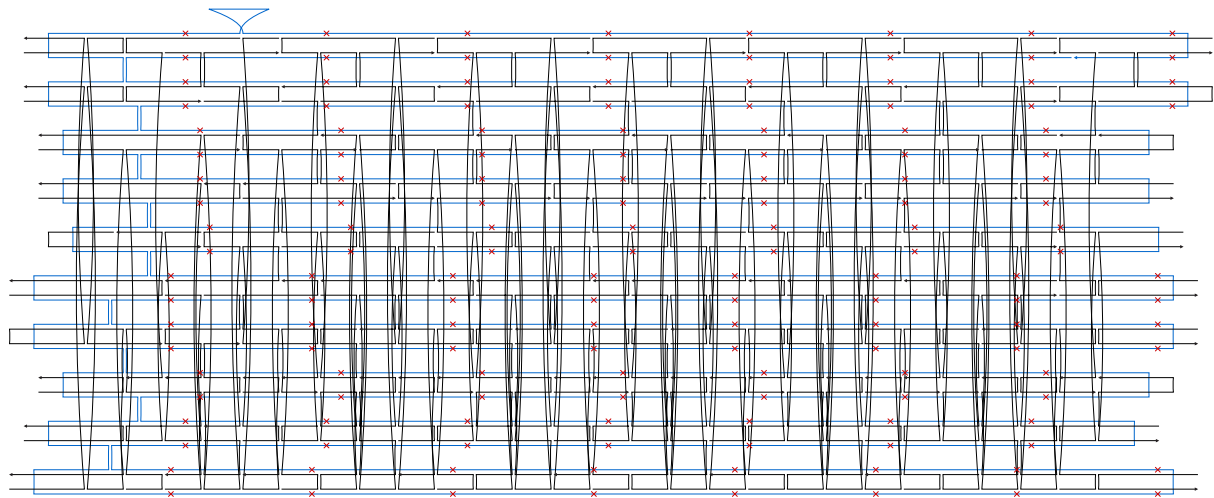

**Fig. S11 | Scaffold routing and staple design for 20HB\_3xSV40.** Scaffold routing is shown in blue, staples are given in black, skips are given as red crosses. Design was prepared using caDNAo v0.1.

**Table S6 | Individual staple sequences for sc\_mCherry\_3xSV40 20HB.**

| Name   | Sequence 5' - 3'                           |
|--------|--------------------------------------------|
| core_1 | CTTTCTCCCTTCGGGAAGCGTGGGGAACATAAAGTGCCA    |
| core_2 | GCTTACCGTTGTTAAAAATTCGCGCTAGGGCCGTCATA     |
| core_3 | CCCTCGTGTGCTCAGCTCATTCTTTTAAAGGAAGCAGAACTT |
| core_4 | TAAAGATACGGCAAAATCCCTTATTGACGGCGTTCTT      |
| core_5 | AAGTCAGAACCGAGATAGGGTTGGGAACCCTTACCGCT     |
| core_6 | CCCTGACGGAACAAGAGTCCACTTGGGGTCCACTCGT      |
| core_7 | CGTTGCTACTCCAACGTCAAAGGACTACGTGTTTACTT     |
| core_8 | CGTCATTATTGCGTACTATGCTGTGCTTATATAGA        |
| core_9 | GTGAGCAAAATACGTAGATGTACTTGCCAAAATGATGATG   |

|         |                                                  |
|---------|--------------------------------------------------|
| core_10 | GCCAAGTTAAATTAAGAAGGCACAGCATCAACCATCACTGGGGAC    |
| core_11 | CCTCCCACCGTACACGTCAATGGATTTGTTGGGTTCCGC          |
| core_12 | CCTACCGCAGTAAGCAGTGGGTTCCGTAGGCCACGCTCAC         |
| core_13 | CCATTTGCGTCAATGGGGCGGAGCAGTTTACAAAAAGGATTGAATGT  |
| core_14 | TTGTTACCTATAGTGAGTCGTATGGACAGGAGCCCCAGT          |
| core_15 | GACATTTTGGAAAGTCCCCTTGATATATGATATTCTACGGCAGGGTTA |
| core_16 | TTTGGTGAAGTTTAAACGCTAGCCACCCCTATAACTAC           |
| core_17 | CCAAAACAAACCTCCATTGACGTGTCATTGAAACTCACCTTCCTTT   |
| core_18 | AATGGGGGACTAGTGGATCCGAGGGTGCCCTCCATAG            |
| core_19 | TGGAGACTTGGAAATCCCCGTGACTGGGCATATCAAAGGGCGACA    |
| core_20 | GTCAAACCGCTCACCATGGTGGCGCCCTCGAACCTATC           |
| core_21 | TCTAGTTAGTGGTTTTAAGTCCCTATTGACGTCAATGGGC         |
| core_22 | GCCATGTGAGCCCTCTGACAGTGCTCCGGCCATGTTATTTCCCTC    |
| core_23 | AACTGAGGTAATTTCCGGCGCAGAACGTAATAGTCAGCCAGGCGGGCC |
| core_24 | GCAGGGGGCCAGCTTGTTGATCTTCACTTGATTGTAACGCGGAACTCC |
| core_25 | GGCGGTCTGCTCGGTAGGAACGAACGTCAATAACTAATGACCCCGTAA |
| core_26 | TCGCCCTCGAATTCCACATGAGATTAATGCCAAACTAGTCAATAATC  |
| core_27 | CGTTCACGTATCCTCCATCCTTTAGGAAAGTTCTGGCCCGTACATC   |
| core_28 | CACGCGCTCCTCCATCGCTGCAATATACCGCGATTTAGAA         |
| core_29 | CGGTCACCAGCTAGAGGATACGGGGCTCATCATTGTCTCA         |
| core_30 | TCGCCGTCTTGCGCAATTGCCTGAAAACCTCTCTTCAATAT        |
| core_31 | GGTGCCGCTCGTGGTGTGACGCGATCCAGTTTCGCGGAAATG       |
| core_32 | TCTGCATTTTCATTCATACCAATCTGATCTTAAATGCCG          |
| core_33 | CCTCGTTGGTGGCGGCCCTCGGCAACAAAAGAGTCATTC          |
| core_34 | ACTTGACAGCTCGTCGCAAGAAATGCTTTTCTAAGCAGGCGAAAGG   |
| core_35 | TACCCGGCCCTCTAGACCCAGCATAATTCTCAGCCTTGCGGCGAACG  |
| core_36 | GGCTGATCAGCGGGTTCTCCCTTGTATCAGCGGGTTTGCCCCGA     |
| core_37 | CAGATGGCTGGCAACTCCAGAAATCCGATCGTGAGATGCACGTAAAGC |
| core_38 | GTC AAGGAAGGCACGGGCGATGCAGTGCAAAGGGGAGCCCCAAT    |
| core_39 | AATAGAAATTGGACACATGCCGTTATCCGCCACTTGTACATG       |
| core_40 | TAGAGCCCACCGCATCTCGAGCTGCCGGGAACGCCGCGCAAGG      |
| core_41 | ATTGTCTTCCCAATCTAAACGGTTAATAGTCTGCAGGGTTCAGCTT   |
| core_42 | TGCCCCACCCACCCAGAAGGCATACAGGCAGCAGCTTCGGCGGCC    |
| core_43 | ACCTACTCAGACAATGGGAGGGGGGTATGGCACGGGGCCCTCGTGGC  |
| core_44 | TGCATGCTTTCATACTTCTGCCTGCCTGCTAAGCGGTTGCACCCAA   |
| core_45 | CGCGCTTTGAGAATAGTGTATCCCAGCCGGACTCCCGGTA         |
| core_46 | AATGTCACGTGTAGCGGTCACGCGTAAGCGCCCCGAA            |
| core_47 | GCCTAACCTGTGACTCGGGATAGATACCGCCAGATTACATAAGCC    |
| core_48 | GTGCGTCATTACTGTCTAAAAGTAGGGCTTAAAGATCCTGGTCTCC   |
| core_49 | GCTGATCACTCATGGTCCGGGCGACTCCCCGTCGCTCAGTCCAAGCTT |
| core_50 | GACTAATTTGTCAGAAGTTGAGATCTGTCTATATTTTGGTCCACACTG |
| core_51 | TGCGCGTAGGTATGCGGCGACCGGATTTAT                   |
| core_52 | AGCGGGCGTTAAATTTAAATAAATTGGGCGCTCCACCCATTGACG    |
| core_53 | TGGCGAGAACCAATAGTGAGCGGGTAAGTTAGTACTGCCAAGTGGG   |
| core_54 | TTTAGAGCTAAATCAATATTGAAGGGCTATGAGGGGGCGTACTTGGC  |
| core_55 | ACTAAATCAGTGTGTTTGAATACCTATTAATGGCGGGCCATTTACC   |
| core_56 | CAAGTTTTTATTAAGCAAAAAAGCGGTATACCCATAAGGTCATGTA   |
| core_57 | TTGTTAAACGCTCTCCTGTTCCGACCCTGCCGGGGGTCGCAAATAGG  |
| core_58 | GCCGAAATCCAGGCGTTTCCCCCTGGAAGCTATTTACCATACATAT   |
| core_59 | AAGAATAGGGTGGCGAAACCCGACAGGACTAATATATGCATTTAT    |
| core_60 | TCCAGTTTGAGCATCACA AAAATCGACGCTCTTGATTATCATACT   |
| core_61 | AACGTGGGGCGTTTTTCCATAGGCTCCGCCAATGTCAAGGAATAA    |
| core_62 | TTGCCCGGGCTGGCAAAAAGCAGCGCAAAACAGACTCG           |
| core_63 | CCACATAGGGAAGAAAATTCTTCATGCAATTGGAGCCT           |
| core_64 | TTGGAAAAGGAAAGCCCTTGTTGTAGTCGAGGATGCAT           |
| core_65 | AAGGATCTAAAGGGAAAAGCTTTGGTTGCTATCTCTAG           |
| core_66 | ATGTAACCGAGGTGCTGCTTTCGATACTTCTGCTGGGG           |
| core_67 | GGTGAGTACTGCAACTCCGGTGGATGGGAGGTGATGTCCAACCTTGAT |
| core_68 | ATGCCATTAATTGTGGCCGCTCTGTAGGCGCCGGGCAGCTGCACG    |
| core_69 | TATGGCATCGCCAGGCCCTCCTGGCCTTGTAGGTGGTCTTGACCT    |
| core_70 | GTAAGTCCATTGCCAGTCGATAGTGCCCGCCGTCCTTCAGCTT      |

|          |                                                                           |
|----------|---------------------------------------------------------------------------|
| core_71  | AGTCCTTCGTCGTTTCAAACAAGCTTGATCTCGCCCTTCAGGGCG                             |
| core_72  | GAGCGCAGCGGCTCCAAGTTGCTCGCACATTTTTAATATT                                  |
| core_73  | AAGTGGTCTCAACCAGAACCTTTAGCGGCCGCATCCCCAGTTTAGT                            |
| core_74  | CAGTCTATCCGTAAGAGCGAGCCAGGGGACTTTCCACACCGGATCTCT                          |
| core_75  | TAAGTAGTGCACCTGCATGCCTGCTGCTTTCATACCTTCTGCCTGCTGG                         |
| core_76  | CGTTGTTGGGCCGAGTGCTGTCCAGCTTTGGTTGCTGACTAATTGA                            |
| core_77  | TCACGCTCGGTCTAGAAATGACAGCCTGGGGACTTTCCACACCGG                             |
| core_78  | GCTTAATCTCACCTAGTCGCCCTTGTATCCACGCCCATTTGATGTAC                           |
| core_79  | CCACCGCTCAGCAATAGCTGATGTGCGCGGGGTGCTTCA                                   |
| core_80  | CAAGCAGGAGACCCCTTGGAGCCGAAGCCCTCGGGGAAG                                   |
| core_81  | TCTCAAGCCATCTGTGTCCCAGCGTCTCGAAGTTCATGTTGACGT                             |
| core_82  | GGTCTGACGTGTAGGGTCACCAGGAGTCTGGGTCAGGCTTCTT                               |
| core_83  | GTTAAGGGTTCGTTTCATCGTAGGACCTTGTAGATGAACCAGCGTCG                           |
| core_84  | AAGGATCTAGTGAGGCTCTCGAAGTCGGAGGGGAAGTTCAGCCTCT                            |
| core_85  | AAATGAAGAACTTGGTCCATGTGCAGCCCATGGTCTTCTCCGTCT                             |
| polyT_1  | TTTTTAAAGGCCAGGAACCGTAAAAAGGCCGGCGAATGAAAAAACAG                           |
| polyT_2  | TTTTTACGCTGTAGGTATCTCCGCTTCTGCCTAACTCCTAAATT                              |
| polyT_3  | TTTTTTTCGCTCCAAGCTGGGAGTTCGGTCAAACAAAACGGCTACACTAGTTTTT                   |
| polyT_4  | CCGCATCACCATGGTAATTTTTTTTTTTAGCGATGACTAAGGCCAGCATTTTT                     |
| polyT_5  | TTTTTGTTGAGCCCGACCAACAAAAGAGTTGGTAGCTTTTT                                 |
| polyT_6  | TTTTTGGAGGCCTCCCACCTTGAAGCGTTTTTTTTTTCATGAACCTCT                          |
| polyT_7  | TTTTTCTATCGTCTTGAGTCCAAGTTCACGATGGTGTAGTGACAGCTT                          |
| polyT_8  | AGACACGACTTTTTTTTTTTATCGCCACTGGCAGTGGACTTAGGG                             |
| polyT_9  | GCGTTCGTAAGGGCCCAAGTAGTCGGGGCGCCTTATCCGGTAATTTTT                          |
| polyT_10 | TTTTTGGGAGTGGCACCGATCAAGGTTTTT                                            |
| polyT_11 | TTTTTCTTTGGTTGCTGACTCCGGATGGTTTAAAGTTTTT                                  |
| polyT_12 | TTTTTGAGCGAGGTATGTAGGACCACACCCGCAGTCAGCCACTGGTAACAGGATTAGCATT<br>TT       |
| polyT_13 | TTTCCACAAATTGAGAATTTTATTAGGAAAGGACAGTTTTT                                 |
| polyT_14 | TTTTTTCAGGGCGATGGCCCGGAAAAACCGTCTATTTTT                                   |
| polyT_15 | TTTTTAAGGACAGTATTTACCCGGTGCTACAGAGTCTTTTTTTTTTTGAAGTGGTGCATAGC<br>TCTTTTT |
| polyT_16 | ATGATCCCTTCCCAACTTCCAGGCGGGGTACATCCGCTCGGATTTTT                           |
| polyT_17 | TTTTTCGAGTACTCACCAGCGTTTTTTTTTTTTCTGGGTGAGC                               |
| polyT_18 | TTTTTCAGTTACCTTCGGCAGTGCCTCTGCTGAAGCTTTTT                                 |
| polyT_19 | TTTTTAAGTATATATGAGTATTTTAAATCAATCTATTTTT                                  |
| polyT_20 | TTTTTCTTGATCCGGGTAGGTCGTTTTT                                              |
| polyT_21 | GGTAGCGGCCAGAGAGCTCTGTGCACGAACCCCTTTTT                                    |

### 3.4 sc\_mCherry\_6xSV40

#### Sequence sc\_mCherry\_6xSV40:

ggggatgcgccgctcagctctagagATCCGGTGTGGAAAGTCCCCAGGCTCCCCAGCAGGCAGAAGTATG  
CAAAGCATGCATCTCAATTAGTCAGCAACCAAAGCtctagagATCCGGTGTGGAAAGTCCCCAGGCT  
CCCCAGCAGGCAGAAGTATGCAAAGCATGCATCTCAATTAGTCAGCAACCAAAGCttaaaccATCC  
GGTGTGGAAAGTCCCCAGGCTCCCCAGCAGGCAGAAGTATGCAAAGCATGCATCTCAATTAGTC  
AGCAACCAAAGCttaaaccgctgacgctcagctatacgcgtgacattgattattgactagtattaatagtaataatcaggggct  
attagttcatagccatataatggagttccgctgtacataactacggttaaatggccgctggtgaccgccaacgacccccgcccattgacgt  
caataatgacgtatgtcccataagtaacgccaataggacttccattgacgtcaatgggtggagtattacggttaactgccacttggcagtac  
atcaagtgatcatatgccaagtacgccccctattgacgtcaatgacggttaaatggccgctggtcattatgccagttacatgaccttattgggac  
ttcctacttggcagttacatctacgtattagtcacgtattaccatggtgatgctggtttggcagttacatcaatgggctggtatagcgggttactca  
cggggatttcaagtctccaccctattgacgtcaatgggagtttggcaccataaacaacgggacttccaaaatgtcgtatacaactccgc  
cccattgacgcaaatgggctgtaggctgtacggtgggaggtctatataagcagagctctctggtaactagagaaccactgctactggtt  
atcgaaattaatcagactcaatagggagaccaagctggctagcgtttaaacttaagctggtaccgagctcggatccactagtccagtgtg  
gtggaattcgccaccatggtgagcaagggcgaggaggataaacatggccatcatcaaggagttcatgcttcaaggtgacatggagggct  
ccgtgaacggccacgagttcgagatcgagggcgagggcgagggcgccctacgagggcaccagaccgccaagctgaagtgacca  
aggggtgccccctgcccctgcctgggacatcctgtcccctcagttcatgtacgctccaaggcctacgtgaagcaccgcccgcacatccccg  
actactgaagctgtccttccccgagggctcaagtgaggcgcgtgatgaactcagaggacggcgcggtggtgaccgtgaccaggactcct  
ccctgcaggacggcgagttcatctacaaggtgaagctgcgcccaccaactcccctccgacggccccgtaatgcagaagaagaccatgg

gctgggaggcctcctccgagcggatgaccccgaggacggcgccctgaagggcgagatcaagcagaggctgaagctgaaggacggcgg  
ccactacgacgctgaggtcaagaccacctaaggccaagaagcccgtgcagctgcccggcctacaacgtaacatcaagttggacat  
cacctcccacaacgaggactacaccatcgtggaacagtacgaacgcgagggccgactccaccggcggcatggacgagctgtac  
aagtgagcggccgctcagcttagagggccgggtaaggagggcccgttaaacccgctgatcagcctcagctgtccttctagttgccagcc  
atctgtgttggccctccccgctccttctgaccctggaaggtgccactcccactgtccttctctaataaaaatgaggaaatgcatcgcattgtct  
gagtaggtgtcattctattctgggggggtgggtggggcaggacagcaagggggaggattgggaagacaatagcaggcatgctggggatgc  
ggtgggctctatggctcgttcttctgtgtccaatttctattaaggtccttcttccctaagtccaactactaaactggggatgcgggccgctcagct  
tagagATCCGGTGTGAAAGTCCCCAGGCTCCCCAGCAGGCAGAAGTATGCAAAGCATGCATCTC  
AATTAGTCAGCAACCAAAGCtctagagATCCGGTGTGAAAGTCCCCAGGCTCCCCAGCAGGCAGA  
AGTATGCAAAGCATGCATCTCAATTAGTCAGCAACCAAAGCtttaaacATCCGGTGTGAAAGTCCC  
CAGGCTCCCCAGCAGGCAGAAGTATGCAAAGCATGCATCTCAATTAGTCAGCAACCAAAGCtttaaa  
cccgctgatcagcctcagctacaacaaggcaaggctgaccgacaattgcatgaagaatctgcttagggtagggcttttgcgctgcttggac  
attaagcgcggcgggtgtggtgtacgcgcagcgtgaccgtacacttgcagcgccttagcgcggccttcttcttcttcttcttctc  
ccacgttcgcccgttccccgcaagctctaaatcgggggctcccttaggggtccgatttagtcttaccggcacctcgacccccaaaaactg  
attagggtaggttcacgtagtgggccatgcctgatagacggttttgcctttagcgttggagtccacgttcttaatagtgactctgttcca  
aactgaacaacactcaacccatctcggctattcttggattataagggatttgcgattcggcctattggttaaaaaatgagctgatttaaca  
aaatttaacgcgaatttaacaaaatattaacgcttacaatttaggtggcactttcggggaaatgtgcgccaaccctattgtttattttctaaat  
acattcaaatatgatccgctcatgagacaataaccctgataaatgctcaataatattgaaaaggaagagtatgattcaacattccggtg  
cgcccttattcccttttgcgcattttgccttcttcttctcaccgaaacgctggtaagtaaaagatgctgaagatcagttgggtgcacg  
agtgggttacatgaactggatcacaacagcggtaagatcctgagagtttgcggcgaagaacgtttccaatgatgacacttttaagttctg  
ctatgtggcgggtattatcccgtattgacggcggcaagagcaactcggctgcggcatacactattctcagaatgacttgggtgagtactacc  
agtcacagaaaagcatctacggatggcatgacagtaagagaattatgcagtgctgcataaccatgagtgataaactgcggccaactact  
tctgacaacgatcggaggaccgaaggagtaaccgcttttgcacaacatgggggatcatgtaactgccttgatcgttgggaaccggagct  
gaatgaagccatacacaacgacgagcgtgacaccacgatcctgtagcaatggcaacaacgctgcgcaactattaactggcgaactactt  
actctagctcccggcaacaattaatagactggatggaggcggataaaagtgcaggaccacttctgcgctcggccctccggctggtgttatt  
gctgataaatctggagccggtgagcgtgggtctcgggtatcattgcagcactggggccagatggtaagccctcccgtatcgtatctacac  
gacggggagtcaggcaactatggatgaacgaaatagacagatcgtgagataggtgctcactgattaagcattggtaactgtcagaccaa  
gtttactcatatatacttttagattgatttaaaacttcatttttaattaaaaggatctaggtaagatccttttgataatctcatgacaaaatccctaac  
gtgagtttctgctcactgagcgtcagaccccgtagaaaagatcaaaggatcttctgagatccttttctgcgctgtaactctgctgctgcaaca  
aaaaaacaccgctaccagcgggtgttgggttccggatcaagagctaccaactctttccgaaggttaactggctcagcagagcgcagatac  
caaactgtccttctagtgtagccgttagtgccaccactcaagaactctgtagcaccgctacatacctcgtctgtaactctgttaccagt  
ggctgctccagtgccgataagtctgtcttaccgggttgactcaagacgatagttaccggataaggcgcagcggctcgggtgacaggggg  
gttcgtgcacacagcccagcttgagcgaacgacctacaccgaactgagatacctacagcgtgagctatgagaaagcggccagctcccga  
aggggaaagcggacaggtatccggaagcggcagggctcggaaacaggagagcgcacgagggagctccagggggaaacgctcgtg  
atctttatagctcgtcgggttccgacctcgtactgagcgtcgtattttgtgatgctcgtcagggggcggagcctatgaaaaacgcccga  
acgcgcccttttaccggtcctggttctggtccttctgctcactcatt

**Corresponding 20HB DNA origami design and staple list for sc\_mCherry\_6xSV40:**

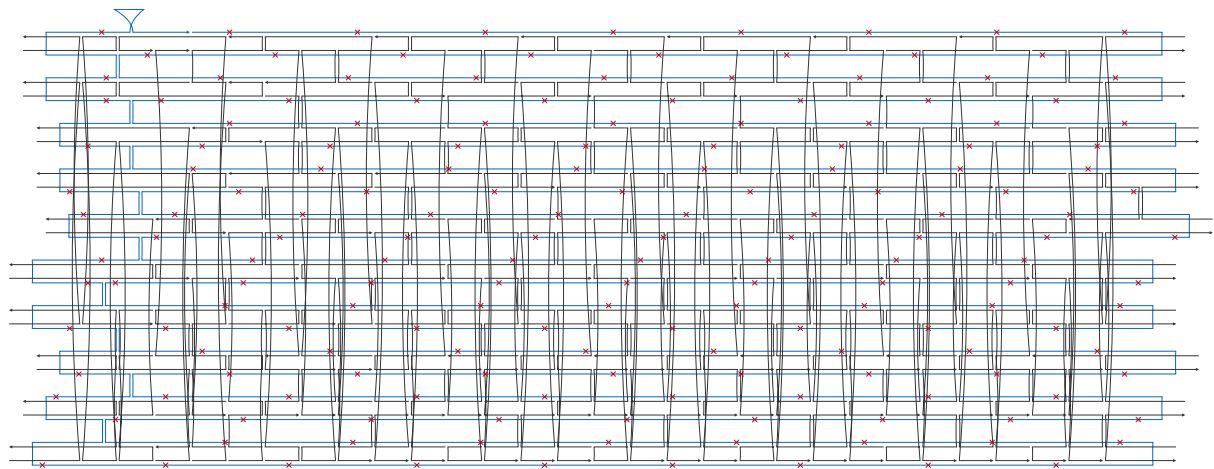

**Fig. S12 | Scaffold routing and staple design for 20HB\_6xSV40.** Scaffold routing is shown in blue, staples are given in black, skips are given as red crosses. Design was prepared using caDNAo v0.1.



**Table S7 | Individual staple sequences for sc\_mCherry\_6xSV40 20HB.**

| Name    | Sequence 5' - 3'                                                    |
|---------|---------------------------------------------------------------------|
| core_1  | CGTAATTGTGGAAAGTCCCTATTTTTTGGT                                      |
| core_2  | AATCAATGTTACCGTAAATACTCTCAATGGG                                     |
| core_3  | TCAGCGGGGATACACTTGATGTAAGTCAAAC                                     |
| core_4  | ATTGAGATTGACGTCAATAGGGCTGCCAAA                                      |
| core_5  | GCTGGGGGGCATAATGCCAGGCGATGACTAA                                     |
| core_6  | GGTCGTTGGGCGGTCAGACTACCGCCATTTGCGTCAATGGGGCGGAACGTCAAT              |
| core_7  | TATGGGATATGGGCTATGAACTGGGGACTT                                      |
| core_8  | GACGTCAAATTAATAATAACGCTTTGCA                                        |
| core_9  | TGGGCAGTTCAACGCGTATAGTCGAGCTTTG                                     |
| core_10 | TGGCATATTTAAAGCTTTGGTTGAGCCTGG                                      |
| core_11 | TACCGTCATGCATGCTTGCATACATGCATGC                                     |
| core_12 | GTTGTTAGAGCTCTGCTTATATGGGTGCTT                                      |
| core_13 | CAGTAAGCAGTGGGTTTGAAGTGAATGAGATTCACCTATC                            |
| core_14 | CCTATAGTGAGTCGTAGGGCAGGGGAACGAAAATCCATAG                            |
| core_15 | TTAAGTTTAAACGCTATTGGCGGTTGATCTTTATAACTAC                            |
| core_16 | GGACTAGTGGATCCGCTCGCCGCGAGAAAGCCCCAGT                               |
| core_17 | TGCTCACCATGGTGGGCCGTTCCGTTTTTACGCTCAC                               |
| core_18 | ATCACGCCCTTGGAGCCGTACACTCTAGTGACTTATC                               |
| core_19 | CACGGTCGATGTCCCAGGCGAATTAATTTACAGGATT                               |
| core_20 | ACTCGCCGCTTGGTCACCTTCAGCGCCAGCTTGTCTACAG                            |
| core_21 | TTGGTGCCCCCTCGTAGGGGCGGCAGCTCGTTACGGCT                              |
| core_22 | CCTCTGCAGCATCTCGAACTCGTGCGAATTCCTCTGCGC                             |
| core_23 | GCTCGGAGCTCCATGTGCACCTTTTATCCTCGAAAAAGA                             |
| core_24 | GTGGAGTTAGACTCGAGCGGCCGATACTTCT                                     |
| core_25 | TGTTCCACGGTTTAAACGGGCCCTTTCCACAC                                    |
| core_26 | CGGCCCTCGGCGGCCCTCGGCGCGTTCGTACCGAAGTTCAGTGAGGATCAAAGAAGTAA         |
| core_27 | ATCAGCGGATGGTGTAGTCCTCGTTGTGGGTCTGGGTTTCGTTCACTCACGTGGTTATG         |
| core_28 | AACTAGAAGGCACAGTGCATCCCCTGGTGTCA                                    |
| core_29 | GGCTGGCTCCAACCTTGATGTTGACGTTGTAGTAGATGATCGTGTAGTCTACGGGTGTCATGC     |
| core_30 | CGGGGGAGGGGCAAACAAGGCGCAACGT                                        |
| core_31 | GGAAGGCAGCAGCTGCACGGGCTTCTTGCCAGGGGAAGACCATCTGAAAAGGATACTGG<br>TGA  |
| core_32 | GGAGTGGCACCTTCCAAGAAAGAGAGTAA                                       |
| core_33 | GGACAGTGGGTCTTGACCTCAGCGTCGTAGTATGGTCTTCGAGACCCTTGTTTGCAATAGTG<br>T |
| core_34 | AATTCCTCATTTTACCCAGCATCATCCAG                                       |
| core_35 | TGCGATGCTCCTCAGCTTCAGCCTCTGCTTACATCCCAGCAATAAAACAACCCCGGCGT         |
| core_36 | TCCCCCTTGACAGAAAGTTGTTGTAGCCCTTATAAATCAAACCTCATTTAAAGTGCT           |
| core_37 | TCTCTAGAGGGAGCCTGGGGACTCCTTACCGCTTAATC                              |
| core_38 | GCTGGGACTAGACTCGAGCGGCCGAGGCTGCTGTCTAT                              |
| core_39 | ATTGAGATTAGTTGGACTTAGGGACAACAGATCTCCCCG                             |
| core_40 | CCGGATGGATAGAAATTGGACAGCAGGGTCAAAGGGCTT                             |
| core_41 | TGCCTGCTAGAGCCCACCGCATCTTAGGAAATGATACCG                             |
| core_42 | ACTAATTTGTCTTCCAATCCTCAGACAAAGATTTAT                                |
| core_43 | CTGGCAAGGCCACTACGTGAAATATTTGACCAGCGT                                |
| core_44 | ACCACCACCAAAGGGCGAAAACTAGGGGTTCCCAACTG                              |
| core_45 | AGCAGCGCGTCCACTATTAAGAAGCCACCTAGAGATCCA                             |
| core_46 | TCTTCATGGGGTTGAGTGTGTTCTAAAATTCGGCGAAAA                             |
| core_47 | AGGGAGCCAGTGTGCAAAAAAGCGAATGAAGT                                    |
| core_48 | ATATTATTGAAGCATGGTGCCGTCCTCCGATCAACGATTTACCAAT                      |
| core_49 | CTCATGAGCGGATACCCATCACCCAGTGTTAGTTTTGGTTCAGCGAT                     |
| core_50 | AGAAAAATAAACAACGCTCTATCGCATAATTTTGCTACATTGCCTGA                     |
| core_51 | ATTTCCCCGAAAAGTCGTGGACAGATGCTTCCAGTTAAGATACGGG                      |
| core_52 | AGCGTTAATATTTTGTGTCAGTTTGCCAAGTCTGTTGCCGCTGCAA                      |
| core_53 | ATTTTTGTTAAATCAGGAATAGACACCGAGTCAACTTTACGGCTCC                      |
| core_54 | AATGTTGACGCTTATTTTAAATCAGAAGTAGTCGGGGATGTCCGCGAGACCTCC              |
| core_55 | GCAAAATACTCCATAACATACGTCATTATTG                                     |
| core_56 | ACAGGAAGGTTATTGTTCCACACCGGATCTCTAGACTCGACGCGGAGCCGCAA               |

|          |                                                                         |
|----------|-------------------------------------------------------------------------|
| core_57  | GAGCAAAAGTTGGCCGCTAATCAAGCGAAAGGAGCGGGCG                                |
| core_58  | TACTTTCAATGTATTTTACTTCTGCCTGCTGGGAGCCTAATGACCCTTCTGGGTCAGCAGC           |
| core_59  | GCATCTTTCAGCACTAGGGCGATGTGTAGCGGTCACGCT                                 |
| core_60  | CTCGTGCACCGCGCACGTTGCTGACTAATTGAGATGCATTAGTCAATATCTTCACGAGGTAT          |
| core_61  | GTAACCCACATCCGTATCCAACGTACCCGCCGCGCTTAAT                                |
| core_62  | CCGCTGTTAATTGTAGGACTTTCCACACCGGATCTCTAGAGGCTGAGTTCGATGAAGTGGT           |
| core_63  | GATCTTAGTACTCAAGAACAAGAAAAACGCCTAACCT                                   |
| core_64  | TTCTTCGGGCGTTAATTTGCATACTTCTGCCTGCTGGGGCTGACTACTCTCAAGAGGACAGT          |
| core_65  | GAAAACGATGCGGCGGAGATACAATTGTCGGTCAAG                                    |
| core_66  | AACTTTATTAACCAGCTTTGGTTGCTGACTAATTGAGTTCTGCCTCATCATTGAGCCAGTT           |
| core_67  | GTTACATGGAAGCCGAAATCGGAACCTAAACTCTTCGACACGGAGGGCCATT                    |
| core_68  | ATTCAGCTGAAGAAAGTTTTTTGGGGTTCGATTATCAGG                                 |
| core_69  | ATGGCTTCCGGATCTGCCTGGGGACTTTCCACACCGGAAAGGAAGGCCGGTCCCGTTGTC<br>A       |
| core_70  | GGCATCGAGTTTAGGCATGCTTTGCATACTTCTGCCTCTAGGGCGCGCTCGTCTCACTCAT           |
| core_71  | TAGTTTGAACCTTTATTTAAAGCTTTGGTTGCTGACTAGCGCGTATGTTGCCACTCTTAC            |
| core_72  | GGGAAGCTCGAGCCATGGGGAGCCTGGGGACTTTCCACAGTCACAAGTAGTTCGTTCTGTG           |
| core_73  | TCCGCTCGCCTGCTAGAGATGCATGCTTTGCATACTTCAAGCAGATTCTATTAATTCTGAG           |
| core_74  | AATTAAGTTAGCTCTAAGGGCCTTTTTCAGCATCCCCAATGAGTGAGCAAGCAGCCAGGC            |
| core_75  | TCCTTTTACTGACAGCAAGGCGAGCCTGCTGGCTTTGGTTGCTGACTAATTGAGTTGACGGG          |
| core_76  | AGGATCTTTAAGACACTAGCCAGACGACATTTTGGAAAGTCCCGTTGAGGCGTTACGCCACT<br>GG    |
| core_77  | TTTTGGTCCGGGACAGACCACGCCGCGCTCCT                                        |
| core_78  | TAAGGGACACTGGTACGATAAGCGCCAAAACAACTCCATTGACGCACCCATTAGCAGAG             |
| core_79  | GCTCAGTGGGCCACCTCCTGCAGGGAGGAGAGGTGATG                                  |
| core_80  | GTCTGACGTAGCGGGGTCTCGTGGAGACTTGAAATCCCCGTGCTGCCAAGAGTTCTT               |
| core_81  | GATCCTTCTGGGTGGCGCAGCTTACCTTGGCGCCGG                                    |
| core_82  | CTCAAGAAGGCCTAACACCAAGCCGCTATCCACGCCATTGATGTAGGCGTACTACACTAG<br>A       |
| core_83  | GATTACGCTCGCCCTTACGGGGCCGTCGGTTGTAGGT                                   |
| core_84  | AAGCAGCAATTTGGTAACCACACTACCGCATACCATGGTAATAGCGGGCCATTTCTGCTGA           |
| core_85  | GTAGCGGTACGGAGCCGAGGCCTCCAGCCCGGCCCGC                                   |
| core_86  | CTATCGTCCGGCCGGGTACCGTAAGTTATGTAAGCGGCC                                 |
| core_87  | TTGAGTCAAAGGGAACCTTCGGTAAAGCACTGCGAACGTGGCGAGA                          |
| core_88  | AACCCGGCACCTAGACACGTAGGGCTCCCACTGAAGCC                                  |
| polyT_1  | TTTTTGGATGGTTTAAATAGGCCGAAATTTTT                                        |
| polyT_2  | TTTTTAAAAAGGCCGCGTTGAAAGGCCGCGCTTTCATACTCAT                             |
| polyT_3  | ATGTAAGTACTGAGCCTGGGGACTTTCCACACCTTTTT                                  |
| polyT_4  | TTTTTCCCATAAAGTTCGTTGGTAGCTCTTTTT                                       |
| polyT_5  | TTTTTAGGCTCCGCCCCCTCTGGCGTGACCGCTGTCATAGCTCAGCTTTTT                     |
| polyT_6  | CTCGCCCTTACGTAGATGTAAGTCCCAAGTAGGAAAGTTTTT                              |
| polyT_7  | TTTTTTGATGATGGCCATGGAAGCGCATGAACCTTTTTT                                 |
| polyT_8  | TTTTTGACGCTCAAGTCAATGTGTGCACGAACCCCTTTTT                                |
| polyT_9  | TTTTTGGCGCCGCTCCTCGGGGGATCTCGTAGAATGACACCTAC                            |
| polyT_10 | TTTTTAGGACTATAAAGATACCCAGCTCGTCCATGCCGCCGCTCGGGGAACCTTGGT               |
| polyT_11 | TTTTTACCCCCAGAACCCCTTCACTTTTT                                           |
| polyT_12 | TTTTTGAAGCTCCCTCGTGCAGCATGCTTTGCCTCACTT                                 |
| polyT_13 | TTTTTTCAGCGGGTTTTAAAGCTTTGGTTGCTGCCTTGCCTGGTCTGTCTTGCACCGCT<br>GACCTTCG |
| polyT_14 | TTTTTTTACCGGATACCTGTGATTTAGAGCATGCTCTCCTGTTCCGACCCTGCCGCTTTTT           |
| polyT_15 | TTTTTTCGGCAAAATTCGAGGCTGATTTTT                                          |
| polyT_16 | TTTTTGGGAAGCGTGAGGAACCGTTTTT                                            |
| polyT_17 | TTTTTCCGCGCCACATAGCAGCAATACGGGATAATTTTTT                                |
| polyT_18 | TTTTTTGTAGGTATCTCCCCCGCCTTTCTCCCTTCTTTTT                                |
| polyT_19 | ATCCCCCATGTTTCGAAAGTATAGTAAGGCGTTTCCCCCTGTTTTT                          |
| polyT_20 | TTTTTGAAGGGCCGAGCGCTGTCTGCCCCACCCCTTTTT                                 |
| polyT_21 | TTTTTCCAAGCTGGGCTCTGTGTAGGTCGTTTCGCTTTTT                                |
| polyT_22 | TATGAGTAAAGGACAGCTTCAGGTGGCGAAACCCGACTTTTT                              |
| polyT_23 | TTTTTTGATCCGGCAACCAGCCAGCCTTTTT                                         |
| polyT_24 | TTTTTCGTTACGCCCTTTTCCATTTTTT                                            |
| polyT_25 | CCGGTAACACCGTACACGCCGAGCATCACAAAATCTTTTT                                |
